# Supplementary material
Source: PubMed Central journal article supplement (PMC2852634)
Supplement: NIHMS161718-supplement-Supplement.pdf [file NIHMS161718-supplement-Supplement.pdf]

## **Aberrant alternative splicing and extracellular matrix gene expression in mouse models of myotonic dystrophy.**

Hongqing Du<sup>1</sup>, Melissa S. Cline<sup>1</sup>, Robert J. Osborne<sup>2</sup>, Daniel L. Tuttle<sup>3</sup>, Tyson A. Clark<sup>4</sup>, John Paul Donohue<sup>1</sup>, Megan P. Hall<sup>1</sup>, Lily Shiue<sup>1</sup>, Maurice S. Swanson<sup>3</sup>, Charles A. Thornton<sup>2</sup>, and Manuel Ares, Jr.<sup>1\*</sup>

<sup>1</sup>RNA Center, Department of Molecular, Cell and Developmental Biology, Sinsheimer Labs, University of California, Santa Cruz, California 95064 USA

<sup>2</sup>Neuromuscular Disease Center, Department of Neurology, University of Rochester School of Medicine and Dentistry, Rochester, NY 14642 USA

<sup>3</sup>Department of Molecular Genetics & Microbiology, University of Florida, College of Medicine, Gainesville, FL 32610 USA

<sup>4</sup>Affymetrix Inc, Santa Clara, CA 95051 USA

**SUPPLEMENTARY FIGURES AND TABLES**

Supplementary Figure 1

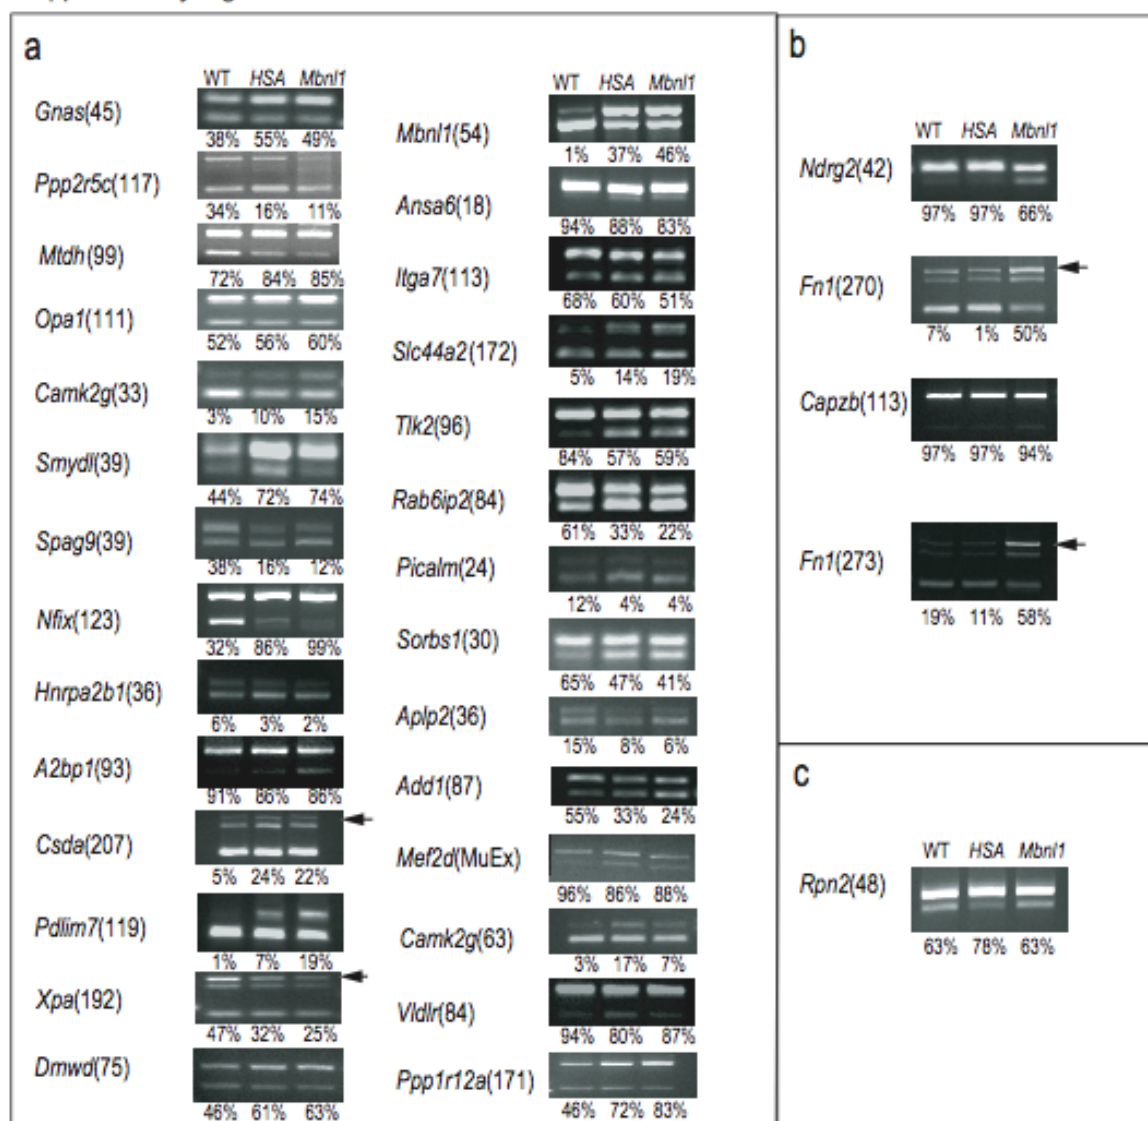

**d**

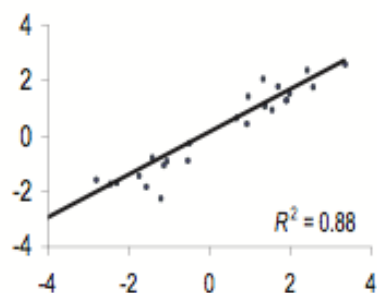

**Supplementary Figure 1** Validation and comparison of mis-spliced events in quadriceps samples of  $HSA^{LR}$  and  $MBNLI^{\Delta E3/\Delta E3}$  mice. RT-PCR fragments were separated on 2.5% agarose gel. The mis-splicing events validated by RT-PCR were classified (**a-c**): 28 RT-PCR validations of mis-splicing cassette exon events predicted by splicing microarray to be altered in both  $HSA^{LR}$  and  $MBNLI^{\Delta E3/\Delta E3}$  mice (**a**); 4 mis-spliced cassette exon events altered only in  $MBNLI^{\Delta E3/\Delta E3}$  mice (**b**); 1 mis-splicing cassette exon event altered only in  $HSA^{LR}$  mice (**c**). (**d**) Comparison of separation score of altered splicing events predicted by RT-PCR in both  $HSA^{LR}$  mice and  $MBNLI^{\Delta E3/\Delta E3}$  mice ( $R^2 = 0.88$ ). Separation score for RT-PCR data were calculated using amounts determined by the Bioanalyzer.

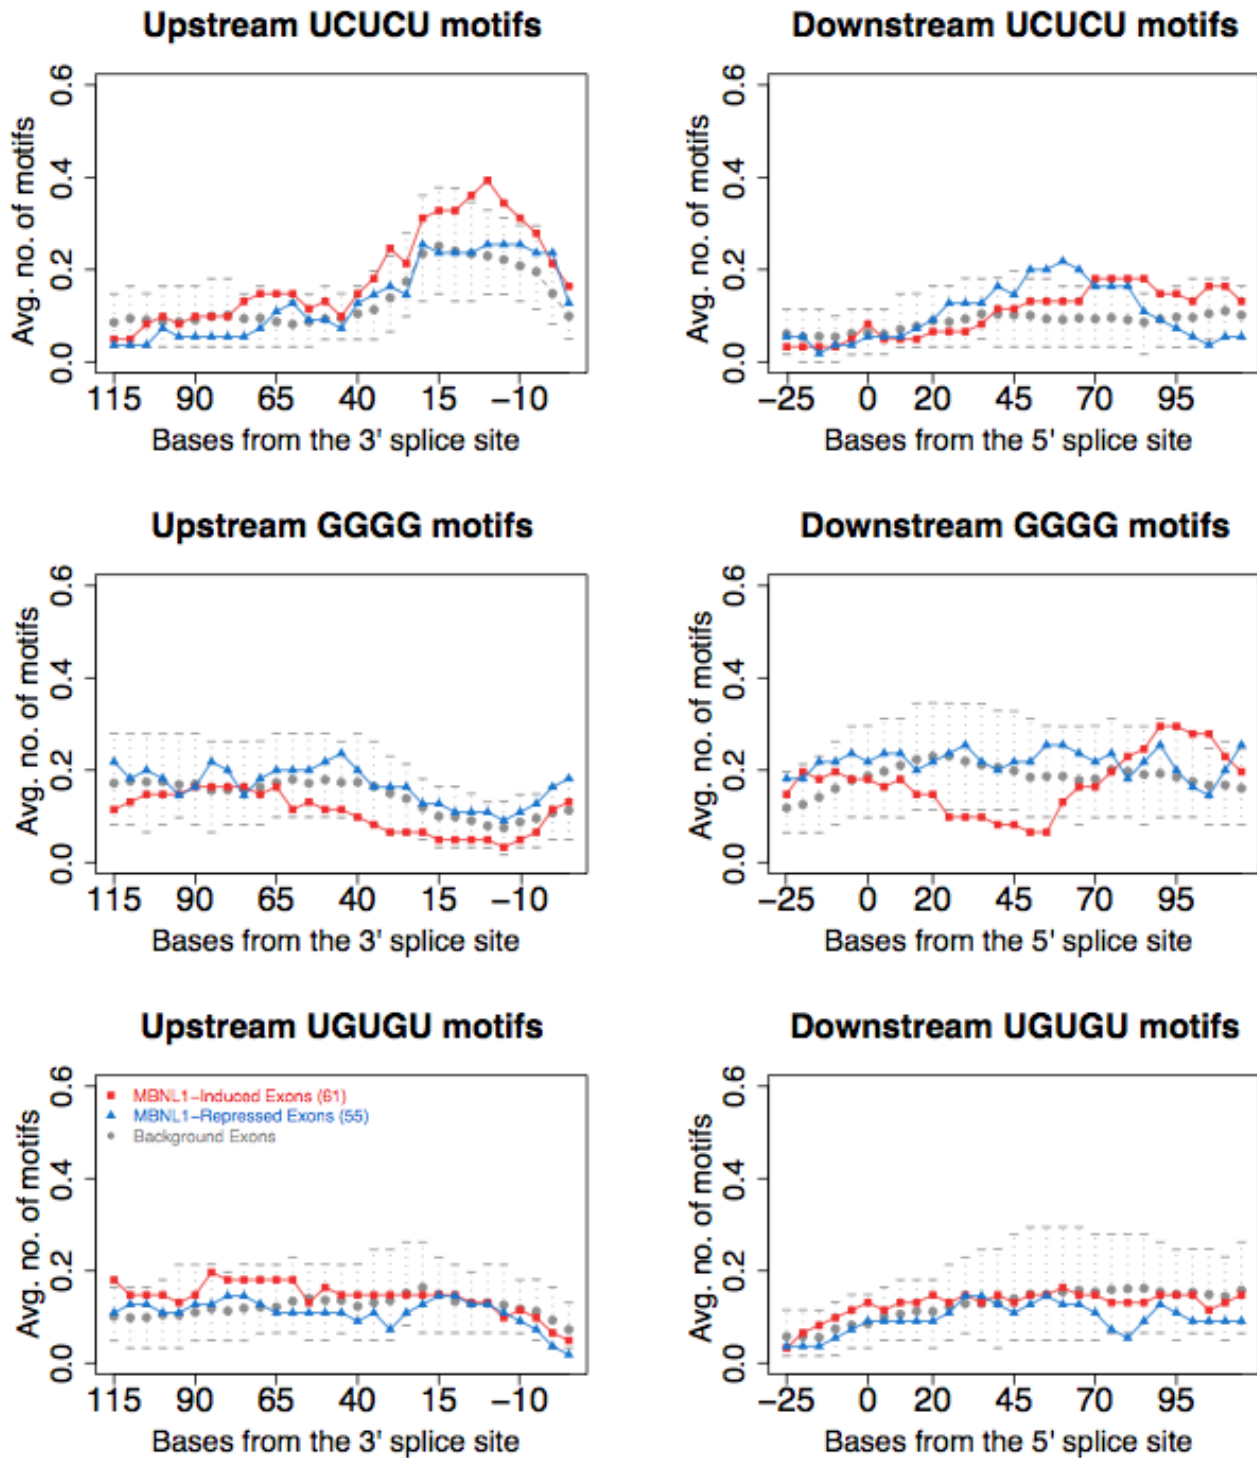

**Supplementary Figure 2** Mapping binding motifs for other splicing factors. (a) PTB/nPTB, UCUCU (b) hnRNP H, GGGG (c) CUGBP1, UGUGU. Each point represents the average frequency of the motif element for the 55 MBNL1-repressed exons (blue triangles), or 66 MBNL1-activated exons (red

squares) or 790 background exons expressed but showing no significant splicing change (grey circles), in each window. Error bars indicate plus and minus two standard deviations.

All mis-splicing events grouped by separation score>0.3

Group (sepscure>0.3 Functional category HSALR and MBNL1 Knockout

| Group (sepscure>0.3 Functional category HSALR and MBNL1 Knockout | gene name          | Splicing mode             | Coordinates in 2006 mouse genome brov | Function in Aceview               | mbln1-has-sepscure | mbln1wt-sepscure | has-wt-sepscure | validation |
|------------------------------------------------------------------|--------------------|---------------------------|---------------------------------------|-----------------------------------|--------------------|------------------|-----------------|------------|
| Cytoskeleton and muscle contraction                              | Camk2g(63)         | altCassette               | chr14:19544243-19548708               | calcium ion transport             | NA                 | -1.2322          | -1.1488         | O          |
|                                                                  | Camk2g(63)         | altCassette               | chr14:19544243-19544224               | calcium ion transport             | NA                 | -1.0091          | -1.1432         | O          |
|                                                                  | Anxa4(18)          | altCassette               | chr11:54829628-54834827               | calcium ion transport, regulati   | NA                 | 0.6118           | 0.4799          | O          |
|                                                                  | Slc38a4(78)        | altTxStart                | chr15:96827612-96877998               | amino acid transport, ion trans   | NA                 | -1.4766          | -0.9866         | ND         |
|                                                                  | Slc38a4(92)        | altTxStart                | chr15:96827612-96877998               | amino acid transport, ion trans   | 0.7731             | -0.7721          | -0.6515         | ND         |
|                                                                  | Tnfrsf1(118)       | altTxStart                | chr11:78344646-78352277               | embryonic development, potas      | NA                 | 0.3353           | -0.3421         | ND         |
|                                                                  | Slc6a8(1533)       | alt5Prime                 | chrX:69928384-69933692                | creatine transporter activity, cr | 0.2312             | -0.551           | -0.6215         | ND         |
|                                                                  | Pdlim7(119)        | altCassette               | chr13:55514972-55518416               | actn cytoskeleton organizer       | 1.3834             | -6.3338          | -2.3723         | O          |
|                                                                  | Pdlim7(305)        | altCassette               | chr13:55514974-55516966               | actn cytoskeleton organizer       | -0.7375            | 2.3549           | 1.7066          | ND         |
|                                                                  | Pdlim3(144)        | altMutEx                  | chr8:47407462-47413958                | actn filament organization        | NA                 | 1.7503           | 1.5867          | ND         |
| Metabolism                                                       | Lmo7(49)           | altTxStart                | chr14:100802337-100812860             | actinin binding, metal ion bindi  | NA                 | 0.4206           | 0.5186          | ND         |
|                                                                  | Vcl(125)           | altTxEnd                  | chr14:19809157-19815707               | oxidoreductase activity, protei   | 0.2804             | -0.3098          | 0.5636          | ND         |
|                                                                  | Sorbs1(30)         | altCassette               | chr19:40418465-40426798               | glucose transport, insulin rece   | -0.3774            | 0.8141           | 0.442           | O          |
|                                                                  | Eno3(112)          | alt3Prime                 | chr11:70473452-70474080               | Glycolysis / Gluconeogenesis,     | NA                 | -0.5805          | -0.514          | ND         |
|                                                                  | Eif4e3(645)        | altTxEnd                  | chr1:89057285-89069027                | Insulin signaling pathway, mTC    | NA                 | -0.8702          | -0.8005         | ND         |
|                                                                  | Acas2(204)         | altTxEnd                  | chr2:155209938-155213457              | acetyl-CoA biosynthetic proces    | NA                 | -0.6283          | -0.7412         | ND         |
|                                                                  | Pfkfb3(42)         | altTxStart                | chr2:11411837-11416201                | fructose 2,6-bisphosphate met     | NA                 | -1.4239          | -1.937          | ND         |
|                                                                  | Siat6(491)         | altTxStart                | chr4:117430573-117632332              | Glycan structures - biosynthes    | -1.7289            | -0.496           | -1.8899         | ND         |
|                                                                  | Lpin1(3344)        | altTxStart                | chr12:16574470-16599189               | lipid metabolic process, regula   | NA                 | -0.7281          | -0.841          | ND         |
|                                                                  | Pldc4(275)         | altTxStart                | chr1:74477671-74481378                | acrosome reaction, intracellul    | NA                 | -0.6438          | -0.8284         | ND         |
| Signaling transduction                                           | Lpin1(42)          | altTxStart                | chr12:16599165-16615207               | lipid metabolic process, regula   | 0.3568             | -0.8435          | -0.7979         | ND         |
|                                                                  | Mknk2(112)         | altTxStart                | chr10:80069111-80075313               | Insulin signaling pathway, MAF    | NA                 | 0.4487           | 0.389           | ND         |
|                                                                  | Atp9a(165)         | altTxStart                | chr2:168331123-168403964              | metabolic process, phospholip     | NA                 | 0.7914           | 0.7845          | ND         |
|                                                                  | Cast(365)          | altTxStart                | chr13:75170103-75274448               | protein catabolic process         | NA                 | 0.3603           | 1.0335          | ND         |
|                                                                  | Gnas(45)           | altCassette               | chr2:173977210-173984604              | GTPase activity, signal transd    | NA                 | -0.6722          | -0.8036         | O          |
|                                                                  | Opa1(111)          | altCassette               | chr16:29509485-29521972               | GTP binding, GTPase activit,      | NA                 | -0.6566          | -0.5233         | O          |
|                                                                  | Ppp2r5c(117)       | altCassette               | chr12:111018563-111028221             | signal transduction               | -0.6415            | 1.4235           | 0.8097          | O          |
|                                                                  | Spag9(39)          | altCassette               | chr11:93928226-93930276               | activation of MAPK activity       | -0.3095            | 1.3689           | 1.127           | O          |
|                                                                  | Ttk2(96)           | altCassette               | chr11:105025917-105037289             | protein kinase activity, ATP bir  | NA                 | 1.3896           | 1.4781          | O          |
|                                                                  | Mezf2(3)           | altMutEx                  | chr3:88242437-88245061                | DNA binding, transcription acti   | NA                 | -1.5532          | -1.9849         | ND         |
| DNA transcription and mRNA processing                            | Mfn2(83)           | altCassette               | chr4:146742429-146747166              | protein binding, GTP binding, i   | 0.7192             | 0.9218           | 1.65            | O          |
|                                                                  | Akt2(163)          | altCassette               | chr7:27314682-27317393                | 1. regulation of JNK cascade, prc | -0.292             | -0.784           | -1.2716         | ND         |
|                                                                  | Homer1(36)         | altCassette               | chr13:94456821-94488291               | metabotropic glutamate recept     | NA                 | -1.3421          | -1.1826         | ND         |
|                                                                  | Mtmr3(111)         | altCassette               | chr11:4385440-4387246                 | dephosphorylation, phosphoric     | NA                 | 0.6044           | 0.6524          | ND         |
|                                                                  | Mgmn1(66)          | altCassette               | chr16:4839750-4842916                 | kinase activity, protein serine/t | NA                 | 0.6357           | 0.7642          | ND         |
|                                                                  | Col4a3bp(78)       | altCassette               | chr13:97717236-97725405               | kinase activity, protein serine/t | NA                 | 1.3444           | 0.8518          | ND         |
|                                                                  | 281004N20Rik(58)   | altCassette               | chr2:90714999-90718278                | phosphatidylinositol metabolic    | NA                 | 0.9864           | 1.1145          | ND         |
|                                                                  | Tbct1d9b(1193)     | altTxEnd                  | chr11:49993305-50001850               | calcium ion binding, GTPase ±     | NA                 | -0.4603          | -0.455          | ND         |
|                                                                  | Tbct1d1(316)       | altTxEnd                  | chr5:64554531-64590310                | regulation of Rab GTPase acti     | NA                 | -0.3118          | -0.3023         | ND         |
|                                                                  | Mappip1(138)       | altTxStart                | chr3:88638429-88638793                | activation of MAPKK activity      | -1.6115            | -0.7463          | -1.4874         | ND         |
| Cell growth                                                      | Uaca(528)          | altTxStart                | chr9:60635835-60638958                | DNA damage response, signal       | NA                 | -0.839           | -0.8496         | ND         |
|                                                                  | Plpnm1(1011)       | altTxStart                | chr7:66719431-66967998                | cell adhesion, dephosphorylati    | 0.1631             | -0.3569          | -0.5016         | ND         |
|                                                                  | Rab44(414)         | altTxStart                | chr13:53330750-55331546               | autophagy, protein transport, s   | NA                 | -0.4708          | -0.3014         | ND         |
|                                                                  | Cd36(177)          | altTxStart                | chr5:17332364-17361494                | cell adhesion, transport          | NA                 | 0.5423           | 0.4224          | ND         |
|                                                                  | Eef2k(172)         | altTxStart                | chr7:120634891-120677813              | protein amino acid phosphoryl     | 0.3175             | 0.5014           | 0.7903          | ND         |
|                                                                  | Dgkz(301)          | altTxStart                | chr2:91741822-91764136                | intracellular signaling cascade   | 0.5465             | 0.3799           | 0.8831          | ND         |
|                                                                  | Map2k6(387)        | altTxStart                | chr11:110295431-110306892             | activation of MAPK activity, ca   | NA                 | -0.7474          | 0.3532          | ND         |
|                                                                  | Jag2(114)          | altCassette               | chr12:11363313-113663700              | growth factor activity, Notch bi  | NA                 | -1.1206          | -1.091          | ND         |
|                                                                  | Mbnl1(54)          | altCassette               | chr3:60701440-60703563                | metal ion binding, nucleic aci    | 0.6094             | -2.6249          | -1.8331         | O          |
|                                                                  | Nfx(123)           | altCassette               | chr8:87611908-87616588                | DNA binding, transcription fact   | NA                 | -1.5055          | -1.3985         | O          |
| Others                                                           | Smyd1(39)          | altCassette               | chr6:71155087-71166950                | protein binding, transcription c  | NA                 | -1.0493          | -1.025          | O          |
|                                                                  | Csda(207)          | altCassette               | chr6:131336094-131345063              | regulation of transcription, DN   | NA                 | -0.4813          | -0.605          | O          |
|                                                                  | Mtdhr(99)          | altCassette               | chr15:3406286-34075763                | regulation of transcription, DN   | NA                 | -0.4974          | -0.4957         | O          |
|                                                                  | Hmrrp201(36)       | altCassette               | chr6:51396663-51399268                | mRNA processing, RNA splinc       | NA                 | 1.0445           | 0.9699          | ND         |
|                                                                  | Mif1(45)           | altCassette               | chr3:67472617-67480834                | myeloid progenitor cell differ    | 1.7683             | -1.8473          | -1.6473         | ND         |
|                                                                  | Nco2(207)          | altCassette               | chr1:13147490-13152122                | negative regulation of transcrip  | NA                 | 0.7276           | 0.6631          | ND         |
|                                                                  | Toea1(32)          | altCassette               | chr1:4798050-4818875                  | positive regulation of transcrip  | -0.3291            | 0.9891           | 0.6714          | ND         |
|                                                                  | Zfp260(206)        | altTxEnd                  | chr7:29815020-29816173                | regulation of transcription, DN   | NA                 | -0.372           | -0.2961         | ND         |
|                                                                  | D8Erd325e(817)     | altTxEnd                  | chr8:126284166-126287517              | regulation of transcription, DN   | NA                 | 0.5705           | 0.6548          | ND         |
|                                                                  | Raly(101)          | altTxStart                | chr2:154548877-154737064              | mRNA processing, RNA splinc       | NA                 | -0.4942          | -0.5925         | ND         |
| D17Wsu155e(74)                                                   | altTxStart         | chr17:6036378-6037351     | DNA repair, nucleotide-excisio        | NA                                | -0.6353            | -0.5002          | ND              |            |
| Cell growth                                                      | Rpo2tc(47)         | altTxStart                | chr15:11938519-11940690               | regulation of transcription, DN   | NA                 | -0.6986          | -0.3187         | ND         |
|                                                                  | Cpeb3(202)         | altTxStart                | chr19:37239886-37272453               | nucleic acid binding, nucleotid   | NA                 | 0.3057           | 0.3393          | ND         |
|                                                                  | Rorc(166)          | altTxStart                | chr3:94460457-94472586                | regulation of transcription, DN   | NA                 | 0.4524           | 0.353           | ND         |
|                                                                  | Fnb1(227)          | altMutEx                  | chr12:77829168-77838930               | negative regulation of cell prol  | 0.2596             | -0.7021          | -0.4351         | ND         |
|                                                                  | Et14(335)          | altTxEnd                  | chr2:20661452-20725855                | embryonic skeletal developmen     | NA                 | 0.8506           | 1.5471          | ND         |
|                                                                  | Fik1(2387)         | altTxStart                | chr5:147956571-147988552              | angiogenesis, cell migration, p   | NA                 | 0.601            | 0.5397          | ND         |
|                                                                  | 1110029E10Rik(172) | altCassette               | chr9:21192944-21104098                | transport                         | NA                 | -3.5728          | -0.8631         | ND         |
|                                                                  | App2(36)           | altCassette               | chr9:30903050-30907271                | protein binding, DNA binding, ;   | -0.3224            | 0.6653           | 0.3423          | O          |
|                                                                  | Add1(87)           | altCassette               | chr5:34936977-34942149                | structural molecule activity, cal | NA                 | 0.449            | 0.3722          | O          |
|                                                                  | A2bp1(93)          | altCassette               | chr16:7200837-7209405                 | nucleic acid binding, nucleotid   | -0.5572            | 1.2469           | 0.791           | O          |
| Picalm(24)                                                       | altCassette        | chr7:90066930-90070861    | phospholipid binding                  | NA                                | 0.7725             | 0.8076           | O               |            |
| Rab6ip2(84)                                                      | altCassette        | chr6:119739508-119745107  | retrograde transport, endosom         | -0.3151                           | 1.381              | 0.9231           | O               |            |
| Others                                                           | Dpp9(119)          | altCassette               | chr17:55823160-55823708               | proteolysis                       | NA                 | -0.9597          | -0.5146         | S          |
|                                                                  | Ap1gp1b(36)        | altCassette               | chr11:83855503-83857005               | endocytosis, protein transport    | NA                 | 0.8446           | 0.5584          | S          |
|                                                                  | Rtn2(6)            | alt3Prime                 | chr7:18449683-18451618                | Unknown                           | NA                 | 0.5186           | 0.3191          | ND         |
|                                                                  | Fcgr1(12)          | alt5Prime                 | chr7:44970213-44970465                | Unknown                           | NA                 | -0.653           | -0.7053         | ND         |
|                                                                  | C3(6)              | alt5Prime                 | chr17:56889474-56889606               | positive regulation of phagocyt   | 0.8757             | 0.51             | 0.9394          | ND         |
|                                                                  | D11Bwg0280e(78)    | altCassette               | chr11:6297677-6298573                 | metal ion binding, zinc ion bin   | NA                 | -1.4536          | -1.4976         | ND         |
|                                                                  | Ap1b(121)          | altCassette               | chr11:4332611-4333702                 | protein transport, vesicle-medi   | NA                 | -1.3892          | -1.3892         | ND         |
|                                                                  | 170011322Rik(54)   | altCassette               | chr11:101235261-101237969             | Unknown                           | NA                 | -0.9178          | -0.7366         | ND         |
|                                                                  | Ankrd11(97)        | altCassette               | chr8:125786230-125794772              | DNA binding                       | NA                 | -0.3937          | -0.5878         | ND         |
|                                                                  | Picalm(150)        | altCassette               | chr7:90052780-90064356                | receptor-mediated endocytosi      | NA                 | 0.5818           | 0.4571          | ND         |
| Others                                                           | 523040G24Rik(172)  | altCassette               | chr1:82606347-82608252                | Unknown                           | NA                 | 0.8173           | 0.4908          | ND         |
|                                                                  | Pcm1(165)          | altCassette               | chr8:42792620-42808351                | Unknown                           | NA                 | 1.1507           | 1.011           | ND         |
|                                                                  | AF114378(117)      | altMutEx                  | chr14:33396645-33407701               | electron transport                | NA                 | -0.8657          | -0.8283         | ND         |
|                                                                  | Tacc2(231)         | altMutEx                  | chr7:130533437-130542351              | protein binding                   | NA                 | 0.8347           | 0.6724          | ND         |
|                                                                  | Fbxo14(384)        | altTxEnd                  | chr8:124450463-124464564              | Unknown                           | NA                 | -0.6817          | -0.4553         | ND         |
|                                                                  | Trp5inp2(131)      | altTxEnd                  | chr2:155073419-155077453              | Unknown                           | -0.1167            | -0.4736          | -0.4033         | ND         |
|                                                                  | Itch(3471)         | altTxEnd                  | chr2:154865412-154894736              | ubiquitin-dependent protein ca    | NA                 | -0.3903          | -0.3894         | ND         |
|                                                                  | D10Erd641e(923)    | altTxEnd                  | chr10:59383657-59386201               | Unknown                           | NA                 | -0.359           | -0.3045         | ND         |
|                                                                  | Ddb1(858)          | altTxEnd                  | chr19:10680020-10696138               | ubiquitin cycle                   | NA                 | 0.3571           | 0.3154          | ND         |
|                                                                  | Fgfr1op2(122)      | altTxEnd                  | chr6:146549904-146552246              | unknown                           | -0.3187            | 0.5665           | 0.3391          | ND         |
| Others                                                           | BC031353(576)      | altTxEnd                  | chr9:74740370-74790881                | unknown                           | NA                 | 0.3101           | 0.3617          | ND         |
|                                                                  | Zfp1a5(208)        | altTxEnd                  | chr7:131183254-131184917              | nucleic acid binding, zinc ion b  | NA                 | 0.3506           | 0.3982          | ND         |
|                                                                  | Dtna(396)          | altTxEnd                  | chr18:23712639-23798834               | protein binding, calcium ion bi   | NA                 | 0.6604           | 0.5198          | ND         |
|                                                                  | Pcbp4(133)         | altTxEnd                  | chr9:106312055-106320650              | Unknown                           | NA                 | 0.6659           | 0.5664          | ND         |
|                                                                  | UBE2D(2098)        | altTxEnd                  | chr18:35927326-35986687               | ubiquitin cycle, ubiquitin-deper  | 0.2025             | 0.5334           | 0.6422          | ND         |
|                                                                  | Ctsc(261)          | altTxEnd                  | chr7:88156582-88163871                | proteolysis                       | NA                 | 0.5792           | 0.6457          | ND         |
|                                                                  | BC031353(576)      | altTxEnd                  | chr9:74740370-74790881                | Unknown                           | NA                 | 0.8224           | 0.7425          | ND         |
|                                                                  | Fbxo14(1363)       | altTxEnd                  | chr8:124438223-124464564              | Unknown                           | 0.224              | 1.3737           | 1.086           | ND         |
|                                                                  | Et14(836)          | altTxEnd                  | chr2:20631193-20661476                | Unknown                           | 0.7003             | 0.6854           | 1.2503          | ND         |
|                                                                  | Dtna(396)          | altTxEnd                  | chr18:23712639-23798834               | protein binding, calcium ion bi   | NA                 | 1.2945           | 1.416           | ND         |
| Ppm2c                                                            | altTxStart         | chr4:11888865-11889380    | calcium ion binding, catalytic a      | NA                                | -2.992             | -2.7218          | ND              |            |
| Trapp3(84)                                                       | altTxStart         | chr15:7863356-72776076    | Unknown                               | NA                                | -1.3529            | -1.4214          | ND              |            |
| Dpp8(183)                                                        | altTxStart         | chr9:84630620-84835124    | proteolysis                           | NA                                | -0.6597            | -1.1618          | ND              |            |
| Slc25a4(86)                                                      | altTxStart         | chr18:31743207-31753457   | transport                             | NA                                | -0.8837            | -0.8025          | ND              |            |
| Gpr108(330)                                                      | altTxStart         | chr17:56930639-56933456   | Unknown                               | NA                                | -0.6878            | -0.7725          | ND              |            |
| BC033455(212)                                                    | altTxStart         | chr5:130507263-130525179  | Unknown                               | NA                                | -0.3623            | -0.5905          | ND              |            |
| Ofb2c(505)                                                       | altTxStart         | chr10:127811717-127814418 | nucleic acid binding                  | NA                                | -0.7689            | -0.5661          | ND              |            |
| Hspa4(468)                                                       | altTxStart         | chr11:53114471-53143495   | ATP binding, nucleotide bindin        | NA                                | -0.508             | -0.5137          | ND              |            |
| Zc3h11a(132)                                                     | altTxStart         | chr1:135474991-135488797  | metal ion binding, nucleic aci        | NA                                | -0.8933            | -0.4947          | ND              |            |
| Comt(306)                                                        | altTxStart         | chr1                      |                                       |                                   |                    |                  |                 |            |

| Grouping            | Gene name     | Splicing Mode             | FVB_MBNL1-sepscore                 | FVB_MBNL1-wt-sepscore            | FVB_HSALR_wt-sepscore | Validation |         |    |
|---------------------|---------------|---------------------------|------------------------------------|----------------------------------|-----------------------|------------|---------|----|
| MBNL1 Knockout only | Atp5c1(645)   | altTxStart                | chr2:9981388-9987560               | transporter activity, hydrogen i | NA                    | 0.4535     | 0.3504  | ND |
|                     | Uaca(175)     | altTxStart                | chr9:60592685-60638958             | protein binding                  | NA                    | 0.3118     | 0.3575  | ND |
|                     | Ghlm(112)     | altTxStart                | chr14:36033858-36046946            | Unknown                          | NA                    | 0.4269     | 0.4318  | ND |
|                     | Park7(306)    | altTxStart                | chr4:149741163-149757705           | ND                               | NA                    | 0.4581     | 0.5651  | ND |
|                     | Maecrd2       | altTxStart                | chr2:14008627-140087130            | Unknown                          | NA                    | 0.6658     | 0.6178  | ND |
|                     | AK009836(130) | altTxStart                | chr9:77025606-77133639             | ND                               | NA                    | 0.5267     | 0.8588  | ND |
|                     | Pcfl1(247)    | altTxStart                | chr2:164570851-164574142           | Unknown                          | -1.2326               | 0.4332     | -0.7449 | ND |
|                     | Schip1(209)   | altTxStart                | chr3:68672147-68684195             | ND                               | NA                    | -0.7518    | 0.3377  | ND |
|                     | Capzb(113)    | altCassette               | chr4:138559899-138563093           | actin binding                    | -0.4172               | 0.5382     | 0.1574  | M  |
|                     | Fn1(273)      | altCassette               | chr1:71545845-71548582             | Regulation of actin cytoskelet   | 1.8877                | -1.9362    | NA      | M  |
| Fn1(270)            | altCassette   | chr1:71536594-71538190    | Regulation of actin cytoskelet     | 2.3858                           | -2.7001               | NA         | M       |    |
| Car3(156)           | altCassette   | chr3:14846030-14848298    | one-carbon compound metabo         | -1.2418                          | 0.6335                | NA         | S       |    |
| Asb1(213)           | altCassette   | chrX:159781316-159789847  | intracellular signaling cascade    | -0.4523                          | 0.4597                | NA         | ND      |    |
| Anapc13(101)        | altTxStart    | chr9:102482716-102490039  | cell cycle, cell division, mitosis | 0.3988                           | -0.8874               | NA         | ND      |    |
| Pcfl1(125)          | altTxStart    | chr11:49745377-49800487   | cell division, regulation of sma   | 1.4352                           | -1.7474               | NA         | ND      |    |
| Jag2(20)            | altPrime      | chr12:113360513-113360985 | growth factor activity, Notch bi   | 0.8253                           | -1.1562               | NA         | ND      |    |
| D3Jfr(93)           | altCassette   | chr3:103169088-103170220  | regulation of transcription, DN    | 0.5901                           | -0.6076               | NA         | ND      |    |
| Hmx1(1125)          | altTxEnd      | chr5:35706031-35709623    | DNA binding, sequence-specif       | 0.4574                           | -0.2962               | NA         | ND      |    |
| Drp1(157)           | altTxEnd      | chr19:5422868-5423340     | negative regulation of transcrip   | 0.5155                           | -0.4215               | NA         | ND      |    |
| Smardc3(138)        | altTxStart    | chr5:24108778-24132803    | heart morphogenesis, muscle        | 0.3728                           | -0.4728               | NA         | ND      |    |
| Scaf1(274)          | altTxStart    | chr7:44871201-44884324    | mRNA processing                    | 0.2963                           | -0.5257               | NA         | ND      |    |
| Bat3(54)            | altCassette   | chr17:34746824-34747300   | apoptosis, proton transport, re    | -0.3433                          | 0.7636                | NA         | S       |    |
| Chd7(57)            | altTxStart    | chr4:8618567-8678792      | heart development, adult walki     | 0.5245                           | -0.6425               | NA         | ND      |    |
| Usp5(69)            | altPrime      | chr6:124783637-124784174  | ubiquitin cycle, ubiquitin-deper   | -0.3387                          | 0.3164                | NA         | ND      |    |
| Sugt1(108)          | altCassette   | chr14:78353939-78359010   | ubiquitin cycle                    | 0.485                            | -0.6578               | NA         | ND      |    |
| Kua(301)            | altTxStart    | chr2:167345861-167380985  | Unknown                            | -0.6676                          | 0.5831                | NA         | ND      |    |
| Hmox2(75)           | altTxStart    | chr16:4641689-4681056     | heme oxidation                     | 0.3665                           | -0.3058               | NA         | ND      |    |
| AW011752(484)       | altTxStart    | chr11:29073437-29088463   | Unknown                            | 0.3817                           | -0.4458               | NA         | ND      |    |
| 2900010J23Rik(27)   | altTxStart    | chr2:32100859-32110054    | Unknown                            | 0.4098                           | -0.8507               | NA         | ND      |    |
| 5730469M10Rik(126)  | altTxStart    | chr14:38906564-38922422   | Unknown                            | 0.4838                           | -0.5989               | NA         | ND      |    |
| Lin54(44)           | altTxStart    | chr5:100720577-100726119  | Unknown                            | 0.6367                           | -0.5946               | NA         | ND      |    |
| ZAK(2084)           | altTxEnd      | chr2:72169281-72239106    | cytoskeleton organization and      | -1.1977                          | NA                    | -1.8907    | ND      |    |
| Mtap1b(1642)        | altTxEnd      | chr13:100535844-100541815 | cytoskeletal regulatory protein    | 0.2968                           | NA                    | 0.3858     | ND      |    |
| Dnm1(67)            | altPrime      | chr16:16227872-16272088   | GTP binding, GTPase activiti       | -0.8641                          | NA                    | -0.8203    | ND      |    |
| Uaca(6)             | altPrime      | chr9:60652494-60654218    | DNA damage response, signal        | 0.5034                           | NA                    | 0.4065     | ND      |    |
| Ramp2(210)          | altTxStart    | chr11:101062644-101064172 | G-protein coupled receptor prc     | -4.3226                          | NA                    | -4.3585    | ND      |    |
| Gnai3(249)          | altTxStart    | chr3:108246371-108273958  | G-protein coupled receptor prc     | -4.0354                          | NA                    | -4.0929    | ND      |    |
| Gfra4(36)           | altTxStart    | chr2:130733112-130734497  | coreceptor activity, GPI ancho     | -0.6385                          | NA                    | -0.6057    | ND      |    |
| Ptp4a2              | altTxStart    | chr4:129341358-129351147  | protein amino acid dephospho       | -0.4576                          | NA                    | -0.3433    | ND      |    |
| Eif4g3(702)         | altCassette   | chr4:137398695-137460151  | regulation of translational initia | 0.5227                           | NA                    | -0.7489    | ND      |    |
| Thra(120)           | altTxEnd      | chr11:98573082-98584378   | ligand-dependent nuclear rece      | 0.4766                           | NA                    | 0.3451     | ND      |    |
| Phf11(102)          | altTxStart    | chr3:41688299-41701033    | regulation of transcription, DN    | -2.9382                          | NA                    | -3.5931    | ND      |    |
| C14orf61            | altTxStart    | chr11:17157651-17163643   | negative regulation of transcrip   | -0.6577                          | NA                    | -0.3802    | ND      |    |
| Phf1(76)            | altTxStart    | chr3:41688299-41701033    | regulation of transcription, DN    | -2.6358                          | NA                    | -2.7545    | ND      |    |
| Car3(93)            | altCassette   | chr3:14843653-14845991    | one-carbon compound metabo         | -1.1408                          | NA                    | -0.5745    | S       |    |
| Rpn2(48)            | altCassette   | chr2:157013301-157017163  | protein amino acid N-linked gl     | -0.6277                          | NA                    | -0.7149    | H       |    |
| 2310030N02Rik(57)   | altCassette   | chr4:10989284-10997361    | ND                                 | -0.6818                          | NA                    | -0.5159    | ND      |    |
| Etf(15)             | altPrime      | chr9:55280462-55283421    | electron transport                 | 5.5072                           | NA                    | 4.8036     | ND      |    |
| Rere(393)           | altTxEnd      | chr4:149419635-149459457  | chromatin remodeling, multice      | -5.4728                          | NA                    | -6.3357    | ND      |    |
| Gphbp1(609)         | altTxEnd      | chr15:75423909-75425347   | cholesterol transport, lipid tra   | 0.351                            | NA                    | -0.6701    | ND      |    |
| AK006195(66)        | altTxEnd      | chr3:88381321-88382704    | Unknown                            | 0.5061                           | NA                    | 0.5257     | ND      |    |
| Bcas2(598)          | altTxEnd      | chr3:103303491-103306414  | Unknown                            | 0.5969                           | NA                    | 0.7117     | ND      |    |
| Dsip1(330)          | altTxStart    | chrX:135887433-135889221  | Unknown                            | NA                               | 0.2215                | -0.4488    | ND      |    |
| Nudt4(66)           | altTxStart    | chr10:94981149-94991801   | diphosphoinositol-polyphosphi      | -2.2457                          | NA                    | -2.3912    | ND      |    |
| Co14a2(4086)        | altTxStart    | chr6:11313467-11445049    | extracellular matrix structural c  | -0.6353                          | NA                    | -0.4544    | ND      |    |
| A1314180(45)        | altTxStart    | chr4:58973121-59005937    | binding                            | 0.3147                           | NA                    | 0.3017     | ND      |    |
| Dazap2(156)         | altTxStart    | chr15:100443703-100447750 | protein binding                    | 0.3392                           | NA                    | 0.3319     | ND      |    |

Extra validation in AltCassette exons beyond sepscore cutoff>0.3

| Grouping               | Gene name             | Splicing Mode | FVB_MBNL1-sepscore | FVB_MBNL1-wt-sepscore | FVB_HSALR_wt-sepscore | Validation |
|------------------------|-----------------------|---------------|--------------------|-----------------------|-----------------------|------------|
| Both HSALR and MBNL1KO | BC047531(116)/Eif4g3  | altCassette   | NA                 | NA                    | -0.7489               | S          |
|                        | Vldlr(84)             | altCassette   | NA                 | NA                    | 1.1598                | O          |
|                        | Ndrp2(42)             | altCassette   | NA                 | 1.6857                | NA                    | M          |
|                        | Dmwd(75)              | altCassette   | NA                 | -0.2427               | NA                    | O          |
|                        | Xpa(192)              | altCassette   | NA                 | NA                    | NA                    | O          |
|                        | Pacsin2(123)          | altCassette   | NA                 | 0.5125                | NA                    | F          |
|                        | Exoc7(93)             | altCassette   | NA                 | 0.3172                | NA                    | F          |
|                        | Cacna2d1(21)          | altCassette   | NA                 | -0.3829               | NA                    | F          |
|                        | Akr1a4(90)            | altCassette   | NA                 | 0.5531                | NA                    | S          |
|                        | Sdfr2(59)             | altCassette   | NA                 | NA                    | NA                    | S          |
| HSALR only             | 2610015J01Rik(74)/Rb1 | altCassette   | NA                 | NA                    | -0.8454               | S          |
|                        | Itga7(113)            | altCassette   | NA                 | NA                    | 0.4716                | O          |
|                        | BC054358(93)/Sec31a   | altCassette   | NA                 | NA                    | 0.6124                | F          |
|                        | Ubt1(111)             | altCassette   | NA                 | NA                    | -0.3241               | F          |
|                        | Zmynd11(96)           | altCassette   | NA                 | NA                    | -0.494                | F          |
|                        | G7018701_RC_a_at(57)  | altCassette   | -0.6818            | NA                    | -0.5159               | F          |
|                        | Tmc6(145)             | altCassette   | NA                 | NA                    | NA                    | F          |
|                        | Ufs2(201)             | altCassette   | NA                 | NA                    | -0.4924               | S          |
|                        | Nfix(148)             | altCassette   | NA                 | NA                    | -0.4902               | S          |
|                        | Hdac2                 | altCassette   | NA                 | NA                    | -0.4223               | S          |
| Strn3(111)             | altCassette           | NA            | NA                 | 0.5763                | S                     |            |
| AK129064(225)/Arhgef7  | altCassette           | NA            | NA                 | -0.848                | S                     |            |
| AK031374(108)/Huwe1    | altCassette           | NA            | NA                 | -0.3961               | S                     |            |
| AK078881(45)           | altCassette           | NA            | NA                 | NA                    | S                     |            |
| Fxr1h(92)              | altCassette           | NA            | NA                 | NA                    | S                     |            |
| BC047531/Eif4g3(1953)  | altCassette           | NA            | NA                 | NA                    | S                     |            |
| G6868353@J910214/Cc    | altCassette           | NA            | NA                 | NA                    | S                     |            |
| Taf12(252)             | altCassette           | NA            | NA                 | NA                    | S                     |            |
| Fkbp6(120)             | altCassette           | NA            | NA                 | NA                    | S                     |            |
| 1110006G06Rik/FAM98C   | altCassette           | NA            | NA                 | NA                    | S                     |            |
| Ppp1r12a(171)          | altCassette           | NA            | NA                 | NA                    | O                     |            |

Validation Table Summary for AltCassette exons.

| Validated/Called-> | KO + HSA +   | KO + HSA - | KO - HSA + |
|--------------------|--------------|------------|------------|
| Total              | 45           | 17         | 23         |
| tested             | 27           | 15         | 21         |
| KO - HSA -         | 0            | 4          | 1          |
| KO + HSA +         | 23           | 2          | 1          |
| KO + HSA -         | 0            | 4          | 0          |
| KO - HSA +         | 0            | 0          | 1          |
| 1band              | 4            | 5          | 14         |
| TP (no 1 band)     | 100%(23/23)  | 40%(4/10)  | 14%(1/7)   |
| (with 1 band)      | 85.2%(23/27) | 27%(4/15)  | 5%(1/21)   |
| Not tested         |              | 18         | 2          |

**Supplementary Table 1. Grouping of aberrant exons in quadriceps skeletal muscle of two mouse models in the FVB background.** Microarray data ( $MBNL^{AE3/AE3}$  vs  $HSA^{LR}$ ,  $MBNL^{AE3/AE3}$  vs wt and  $HSA^{LR}$  vs wt) are analyzed by separation score analysis. Altered splicing events identified from splicing microarrays were divided into three groups by using separation score above 0.3: Overlapping group ( $MBNL^{AE3/AE3}$  vs wt  $\geq 0.3$  and  $HSA^{LR}$  vs wt  $\geq 0.3$ );  $MBNL^{AE3/AE3}$  only group ( $MBNL^{AE3/AE3}$  vs wt  $\geq 0.3$ ;  $HSA^{LR}$  vs wt  $\leq 0.3$ ;  $MBNL^{AE3/AE3}$  vs  $HSA^{LR}$   $\geq 0.3$ );  $HSA^{LR}$  only group ( $MBNL^{AE3/AE3}$  vs wt  $\leq 0.3$ ;  $HSA^{LR}$  vs wt  $\geq 0.3$ ;  $MBNL^{AE3/AE3}$  vs  $HSA^{LR}$   $\geq 0.3$ ). Those events are further grouped in this table by function acquired from Aceview. Chromosome coordinates in UCSC genome browser for mouse (mm8, 2006) are shown, and validation results are labeled with O (overlapping), M ( $MBNL^{AE3/AE3}$  only), H ( $HSA^{LR}$  only), F (false positive), S (single band in RT-PCR) and ND (Not determined).





**Supplementary Table 2. Motif searching list with sequences of Mbnl1-regulated exons identified from splicing microarrays in mouse skeletal muscle, heart and in the literature.** +/- indicates the Mbnl1-repressed exons whose inclusion increases on loss of Mbnl1 (-), and Mbnl1-activated exons whose skipping increases on loss of Mbnl1 (+). The upstream intron sequences (150-40) includes 150bp upstream intron and 40bp exon near 3'ss, and the downstream intron (40-150) includes 150bp downstream intron and 40bp exon near 5'ss. Median conservation score for the indicated sequence is from the UCSC genome browser.

Expression changes grouped by cutoff (q<0.05; FC>1.5)

| Grouping                              | Function Category                     | Gene Name | Coordinates in 2006 mouse Genome browser | Function                                                                                                 | HSALR-wt-q value | HSALR-wt-d value | HSALR-wt-fold change | Log2FC(HS) value | MBNL1-wt-q value | MBNL1-wt-d value | MBNL1-wt-fold change | Log2FC(MB NL1-wt) value | HSALR-MBNL1-q value | HSALR-MBNL1-d value | HSALR-MBNL1-fold change | Validation |    |
|---------------------------------------|---------------------------------------|-----------|------------------------------------------|----------------------------------------------------------------------------------------------------------|------------------|------------------|----------------------|------------------|------------------|------------------|----------------------|-------------------------|---------------------|---------------------|-------------------------|------------|----|
| Metabolism                            | Ion channels and transport            | Cacng1    | chr11:107519307-107532566                | calcium ion transport                                                                                    | 0                | 8.73             | 2.25                 | 1.169925         | 0                | 7.49             | 1.7                  | 0.76553475              | 0.025               | 4.56                | 1.32                    | ND         |    |
|                                       |                                       | Atp1b4    | chrX:34560880-34581339                   | ion transport, potassium ion transport                                                                   | 0                | 7.61             | 1.96                 | 0.97085365       | 0.036            | 3.44             | 2.19                 | 1.13093087              | 0.46                | -6.18               | -1.11                   | ND         |    |
|                                       |                                       | Tnnc1     | chr4:30037320-30040720                   | Calcium signaling pathway                                                                                | 0.034            | -2.73            | -1.82                | -0.86393985      | 0                | -8.48            | -4.78                | -2.25707106             | 0.253               | 2.42                | 2.61                    | O          |    |
|                                       |                                       | Myoz2     | chr3:12296229-123026971                  | structural molecule activity in actin cytoskeleton                                                       | 0.009            | -4.38            | -1.56                | -0.641546        | 0.036            | 0.34             | 1.52                 | 0.60407132              | 0.015               | -5.31               | -2.31                   | ND         |    |
|                                       |                                       | Nrap      | chr19:56373293-56443285                  | actin cytoskeleton organization and biogenesis                                                           | 0.003            | 6.42             | 1.54                 | 0.62293035       | 0.02             | 4.13             | 1.56                 | 0.64154603              | 0.527               | -0.112              | -1                      | ND         |    |
|                                       |                                       | Rock2     | chr12:16920669-17003586                  | actin cytoskeleton organization and biogenesis                                                           | 0.005            | -5.47            | -1.63                | -0.704872        | 0.011            | -4.12            | -1.62                | -0.6959938              | 0.527               | -0.0653             | -1                      | ND         |    |
|                                       |                                       | Myz2      | chr5:122361595-122367471                 | cardiac myofibril assembly                                                                               | 0.016            | -3.57            | -1.53                | -0.6135317       | 0                | -10.4            | -2.32                | -1.2141248              | 0.225               | 2.21                | 1.51                    | ND         |    |
|                                       |                                       | Pdim7     | chr13:55505430-55523056                  | actin cytoskeleton organization and biogenesis                                                           | 0                | -1.6             | -2.67                | -1.4168397       | 0                | -14.8            | -2.89                | -1.5310695              | 0.373               | 1.77                | 1.12                    | O          |    |
|                                       |                                       | Tnnc1     | chr1:137616243-137627374                 | actin binding, structural constituent of cytoskeleton                                                    | 0.045            | -2.33            | -1.63                | -0.704872        | 0.006            | -6.43            | -3.16                | -1.6599246              | 0.308               | 1.95                | 1.94                    | ND         |    |
|                                       |                                       | Pdim3     | chr8:47384287-47418363                   | actin filament organization                                                                              | 0                | 9.94             | 1.96                 | 0.97085365       | 0.049            | 3.09             | 1.74                 | 0.79908731              | 0.563               | 0.953               | 1.12                    | ND         |    |
| Metabolism                            | Metabolism                            | Khk       | chr5:31198194-31207826                   | carbohydrate metabolic process                                                                           | 0.007            | -4.94            | -1.56                | -0.641546        | 0.02             | -3.4             | -1.53                | -0.6135317              | NA                  | NA                  | NA                      | 1.02       | ND |
|                                       |                                       | Gpd2      | chr2:57033682-57182985                   | gluconeogenesis                                                                                          | 0.009            | -4.19            | -1.51                | -0.5945485       | 0.006            | -5.74            | -1.55                | -0.6322682              | 0.605               | 0.228               | 1.02                    | ND         |    |
|                                       |                                       | Irs1      | chr1:82,097,506-82,185,189               | insulin secretion, protein kinase B signaling cascade, signal transduction                               | 0.034            | -2.7             | -1.58                | -0.6599246       | 0.049            | -2.57            | -1.55                | -0.6322682              | 0.51                | -0.366              | -1.01                   | ND         |    |
|                                       |                                       | Ace       | chr11:105784057-105805349                | metabolic process, proteolysis                                                                           | 0.016            | -3.6             | -2.03                | -1.0214797       | 0.049            | -2.58            | -1.55                | -0.6322682              | 0.113               | -2.4                | -1.3                    | ND         |    |
|                                       |                                       | Gpd1      | chr15:99545626-99553039                  | gluconeogenesis                                                                                          | 0.008            | -4.53            | -1.63                | -0.704872        | 0.023            | -3.36            | -1.58                | -0.6599246              | 0.527               | -0.259              | -1.02                   | ND         |    |
|                                       |                                       | Lpin1     | chr12:16562115-16536593                  | lipid metabolic process                                                                                  | 0.007            | -5.17            | -1.56                | -0.641546        | 0.006            | -5.92            | -1.64                | -0.7136958              | 0.598               | 0.654               | 1.03                    | ND         |    |
|                                       |                                       | Aact7     | chr4:151021933-151115647                 | fatty acid catabolic process                                                                             | 0.004            | -6.67            | -1.86                | -0.8953026       | 0.006            | -6.67            | -1.87                | -0.9030383              | NA                  | NA                  | NA                      | 1.02       | ND |
|                                       |                                       | Zfp106    | chr2:120198270-120255272                 | insulin receptor signaling pathway                                                                       | 0.006            | 4.71             | 1.72                 | 0.78240856       | 0.005            | 5.91             | 2.07                 | 1.04963077              | 0.225               | -1.69               | -1.2                    | ND         |    |
|                                       |                                       | Fbp2      | chr13:62846507-62867993                  | metabolic process, gluconeogenesis                                                                       | 0                | 15.8             | 5.5                  | 2.6493162        | 0.006            | 5.27             | 2.43                 | 1.28095631              | 0                   | 8.38                | 2.26                    | ND         |    |
|                                       |                                       | Igf2bp5   | chr1:72791271-72806072                   | insulin-like growth factor binding                                                                       | 0                | -7.49            | -3.16                | -1.6599246       | 0.006            | -6.12            | -2.66                | -1.4142652              | 0.373               | -1.01               | -1.18                   | O          |    |
| Signaling pathway                     | Signaling pathway                     | Pfkfb3    | chr2:113892953-114716094                 | fructose 2,6-bisphosphate metabolic process                                                              | 0.014            | -4.38            | -2.71                | -1.4839329       | 0.027            | -3.11            | -2.19                | -1.13939309             | 0.339               | -1.09               | -1.23                   | ND         |    |
|                                       |                                       | Mod1      | chr9:86378093-86492941                   | malate metabolic process                                                                                 | 0.016            | -3.58            | -1.88                | -0.9107327       | 0.009            | -4.39            | -2.29                | -1.1953476              | 0.373               | 1.7                 | 1.21                    | ND         |    |
|                                       |                                       | Iir2      | chr1:40029313-40069769                   | cell surface receptor linked signal transduction                                                         | 0.018            | -3.39            | -1.66                | -0.731832        | 0.043            | -2.74            | -1.5                 | -0.584925               | 0.339               | -1.15               | -1.08                   | ND         |    |
|                                       |                                       | Hira1     | chr7:130727382-130776801                 | negative regulation of BMP signaling pathway, negative regulation of TGF beta receptor signaling pathway | 0                | -7.12            | -1.88                | -0.9107327       | 0.006            | -5.32            | -1.51                | -0.5945485              | 0.156               | -2.01               | -1.24                   | ND         |    |
|                                       |                                       | Tksu      | chr7:98226659-98239890                   | protein binding, transference activity                                                                   | 0.009            | -4.32            | -2.61                | -1.4959937       | 0.049            | -2.58            | -1.54                | -0.6229304              | 0.605               | 0.0251              | 1                       | ND         |    |
|                                       |                                       | Sic8a3    | chr12:82118293-82252028                  | transport, cell communication                                                                            | 0.009            | 4.27             | 1.56                 | 0.64154603       | 0.011            | 4.59             | 1.56                 | 0.64154603              | 0.605               | 0.735               | 1.03                    | ND         |    |
|                                       |                                       | Sinx3     | chr10:42190445-42232782                  | cell communication, protein transport, intracellular signaling cascade                                   | 0.008            | -4.54            | -1.53                | -0.6135317       | 0.006            | -4.68            | -1.58                | -0.6599246              | 0.585               | 0.251               | 1.03                    | ND         |    |
|                                       |                                       | Tnfrsf19  | chr4:59818145-59000079                   | receptor activity                                                                                        | 0.014            | 3.93             | 2                    | 1                | 0.023            | 3.91             | 1.62                 | 0.69599381              | 0.532               | 1.25                | 1.2                     | ND         |    |
|                                       |                                       | Caln1     | chr5:11683166-116849856                  | cell cycle, G-protein coupled receptor protein signaling pathway                                         | 0                | -9.17            | -3.17                | -0.8953026       | 0                | -10.2            | -1.71                | -0.7739963              | 0.605               | 0.773               | 1.06                    | ND         |    |
|                                       |                                       | Sort1     | chr3:108412187-108495655                 | endocytosis                                                                                              | 0                | -7.8             | -1.95                | -0.9634741       | 0.006            | -6.53            | -1.71                | -0.7739963              | 0.373               | -1.04               | -1.13                   | ND         |    |
| DNA transcription and mRNA processing | DNA transcription and mRNA processing | Atm1      | chr19:57664294-58186588                  | G-protein coupled receptor protein signaling pathway                                                     | 0.008            | 4.57             | 2.77                 | 1.46988598       | 0.023            | 3.87             | 1.73                 | 0.79077204              | 0.156               | 2.54                | 1.59                    | ND         |    |
|                                       |                                       | Asb5      | chr8:56049027-56086533                   | intracellular signaling cascade                                                                          | 0.009            | -4.37            | -1.62                | -0.6959938       | 0.006            | -5.59            | -1.87                | -0.9030383              | 0.178               | 2.45                | 1.15                    | ND         |    |
|                                       |                                       | Cckar     | chr11:92249023-92250723                  | Wnt receptor signaling pathway                                                                           | 0.007            | -4.36            | -1.57                | -0.6599246       | 0.006            | -5.86            | -1.98                | -0.9855004              | 0.527               | 1.29                | 1.08                    | ND         |    |
|                                       |                                       | Dok5      | chr2:170423144-170570973                 | MAPKKK cascade                                                                                           | 0                | 8.58             | 1.85                 | 0.88752527       | 0.023            | 3.94             | 2.05                 | 1.03562391              | 0.434               | -0.749              | -1.1                    | ND         |    |
|                                       |                                       | Centb5    | chr4:154735674-154751050                 | regulation of GTPase activity                                                                            | 0.016            | -3.59            | -1.98                | -0.9855004       | 0.009            | -4.54            | -2.32                | -1.2141248              | 0.568               | 0.903               | 1.17                    | ND         |    |
|                                       |                                       | Gdf8      | chr1:53006207-53012624                   | transforming growth factor beta receptor signaling pathway                                               | 0                | -8.27            | -1.84                | -0.8797508       | 0                | -9.44            | -2.38                | -1.2509616              | 0.373               | 1.71                | 1.28                    | ND         |    |
|                                       |                                       | Zfp289    | chr2:19207029-19207760                   | regulation of GTPase activity                                                                            | 0                | -2.69            | -1.47                | -0.6229304       | 0.009            | -4.21            | -2.96                | -1.5659572              | NA                  | NA                  | NA                      | 1.27       | ND |
|                                       |                                       | Tbc1d1    | chr5:64439345-64530621                   | regulation of Rab GTPase activity                                                                        | 0                | 7.34             | 4.09                 | 2.03210084       | 0                | 7.99             | 3.21                 | 1.6825733               | 0.339               | 1.82                | 1.28                    | ND         |    |
|                                       |                                       | Gadd45b   | chr10:80333219-80335333                  | activation of MAPKK activity                                                                             | 0.006            | 4.8              | 2.52                 | 1.3342373        | 0.005            | 5.71             | 2.53                 | 1.33913738              | 0.527               | -0.0269             | -1                      | ND         |    |
|                                       |                                       | Picd4     | chr1:74476095-74499184                   | intracellular signaling cascade                                                                          | 0.004            | -8.44            | -1.61                | -0.6870607       | 0.006            | -5.19            | -1.53                | -0.6135317              | 0.46                | -0.646              | -1.04                   | ND         |    |
| Cell cycle and development            | Cell cycle and development            | Tkfb3     | chr13:52879544-52939471                  | regulation of transcription                                                                              | 0.004            | -3.64            | -1.37                | -0.7398481       | 0.049            | -2.53            | -1.5                 | -0.584925               | 0.434               | -1.01               | -1.32                   | ND         |    |
|                                       |                                       | Hlx1      | chr1:186427930-186433396                 | regulation of transcription                                                                              | 0.021            | 3.53             | 1.52                 | 0.60407132       | 0.005            | 5.99             | 1.57                 | 0.65076456              | 0.51                | -0.326              | -1.03                   | ND         |    |
|                                       |                                       | Sra1      | chr18:36793220-36796267                  | positive regulation of transcription from RNA polymerase I promoter, apoptosis                           | 0.018            | -3.41            | -1.85                | -0.8875253       | 0.027            | -3.1             | -1.73                | -0.790772               | 0.373               | -1.07               | -1.07                   | ND         |    |
|                                       |                                       | Irf5      | chr6:274672-29487329                     | regulation of transcription                                                                              | 0                | 7.91             | 1.79                 | 0.83995959       | 0.049            | 3.05             | 1.83                 | 0.87184365              | 0.488               | -0.528              | -1.08                   | ND         |    |
|                                       |                                       | Smad3     | chr9:6344772-63550000                    | negative regulation of transcription                                                                     | 0                | 6.46             | -1.71                | -0.7739963       | 0                | -7.71            | -1.96                | -0.9708537              | 0.253               | -1.13               | -1.14                   | ND         |    |
|                                       |                                       | Ruvr      | chr11:16949356-169479298                 | regulation of transcription                                                                              | 0.014            | -3.87            | -1.67                | -0.8930383       | 0.015            | -3.83            | -1.98                | -0.9855004              | 0.59                | 0.617               | 1.05                    | ND         |    |
|                                       |                                       | Cugbp2    | chr2:6456970-6802268                     | mRNA splice site selection, mRNA processing                                                              | 0.01             | -4.07            | -1.55                | -0.6322682       | 0.009            | -4.23            | -1.57                | -0.6507646              | 0.605               | 0.374               | 1.01                    | ND         |    |
|                                       |                                       | Sox18     | chr2:181599242-181601046                 | DNA binding, transcription factor activity                                                               | 0.005            | -5.41            | -1.61                | -0.6870607       | 0.006            | -4.82            | -1.59                | -0.6690268              | 0.527               | -1.02               | -1.01                   | ND         |    |
|                                       |                                       | Klf5      | chr4:38181833-38196541                   | DNA binding, protein binding, transcription factor activity                                              | 0.009            | 4.46             | 1.84                 | 0.87975077       | 0.003            | 6.23             | 2.03                 | 1.02147973              | 0.403               | -0.907              | -1.07                   | ND         |    |
|                                       |                                       | Runx1     | chr16:9203862-920386187                  | DNA binding, protein binding, transcription factor activity                                              | 0                | -10.5            | -1.63                | -0.704872        | 0                | -7.56            | -1.84                | -0.7136958              | 0.605               | 0.091               | 1.1                     | ND         |    |
| Cell cycle and development            | Cell cycle and development            | Anapc13   | chr9:102482197-102490054                 | cell cycle, cell division, mitosis, ubiquitin cycle                                                      | 0.028            | -2.85            | -1.54                | -0.6322682       | 0.02             | -3.54            | -1.5                 | -0.584925               | 0.585               | 0.758               | 1.08                    | ND         |    |
|                                       |                                       | Grem2     | chr1:176670459-176758494                 | cytokine activity                                                                                        | 0.004            | -6.14            | -2.66                | -1.4114262       | 0.02             | -3.5             | -1.55                | -0.6322682              | NA                  | NA                  | NA                      | 1.06       | ND |
|                                       |                                       | Pac3      | chr12:113462315-113522209                | apoptosis                                                                                                | 0.005            | -5.9             | -1.53                | -0.6135317       | 0.006            | -6.53            | -1.63                | -0.704872               | 0.253               | 2.1                 | 1.06                    | ND         |    |
|                                       |                                       | Cntf      | chr4:11683166-116849856                  | positive regulation of cell proliferation                                                                | 0.004            | -3.17            | -1.67                | -0.8953026       | 0                | -10.2            | -1.72                | -0.7824086              | 0.605               | 0.866               | 1.01                    | ND         |    |
|                                       |                                       | Lt4h      | chr10:92883194-92914695                  | leukotriene biosynthetic process, proteolysis                                                            | 0.014            | -3.73            | -1.67                | -0.7398481       | 0.006            | -5.12            | -1.77                | -0.8237494              | NA                  | NA                  | NA                      | 1.01       | ND |
|                                       |                                       | Dcun1a    | chr17:28818664-28828386                  | cell cycle arrest, negative regulation of apoptosis                                                      | 0.009            | 4.3              | 1.53                 | 0.61353165       | 0.016            | 4.3              | 1.8                  | 0.84799691              | 0.206               | -1.17               | -1.17                   | ND         |    |
|                                       |                                       | Mtacc2    | chr2:168167616-168292860                 | cytokine production                                                                                      | 0                | 9.84             | 1.92                 | 0.94110631       | 0                | 15.4             | 1.9                  | 0.92599942              | 0.605               | 0.189               | 1                       | ND         |    |
|                                       |                                       | Caln3     | chr7:16073900-16082554                   | cell cycle, G-protein coupled receptor protein signaling pathway                                         | 0                | -10.5            | -1.63                | -0.704872        | 0                | -7.56            | -1.84                | -0.7136958              | 0.605               | 0.091               | 1.1                     | ND         |    |
|                                       |                                       | Trp63     | chr16:25679630-25807429                  | anti-apoptosis                                                                                           | 0                | 8.7              | 2.04                 | 1.02856915       | 0                | 7.88             | 1.91                 | 0.93357264              | 0.545               | 1.11                | 1.06                    | ND         |    |
|                                       |                                       | Casp12    | chr9:5345501-5373032                     | induction of apoptosis                                                                                   | 0                | -7.18            | -2.59                | -1.3729521       | 0                | -9.56            | -2.61                | -1.3840498              | NA                  | NA                  | NA                      | O          |    |
| Cell adhesion                         | Cell adhesion                         | Fh1       | chrX:53078570-53140129                   | involvement in muscle development or hypertrophy                                                         | 0                | 15.5             | 2.73                 | 1.44890096       | 0                | 7.35             | 3.3                  | 1.72246602              | 0.206               | -1.8                | -1.21                   | O          |    |
|                                       |                                       | Chn       | chrX:10915735-109302459                  | blood vessel development                                                                                 | 0.009            | 4.38             | -1.57                | -0.5071646       | 0.009            | -4.48            | -1.51                | -0.5945485              | 0.51                | -0.334              | -1.02                   | ND         |    |
|                                       |                                       | Cy6f1     | chr3:145584361-145587367                 | patterning of blood vessels, regulation of cell growth                                                   | 0.006            | 4.94             | 1.61                 | 0.69700669       | 0.027            | 3.75             | 1.82                 | 0.60407132              | 0.604               | 0.611               | 1.06                    | ND         |    |
|                                       |                                       | Vegfa     | chr17:45480574-45495331                  | angiogenesis                                                                                             | 0.011            | -3.89            | -1.5                 | -0.584925        | 0.011            | -4.19            | -1.57                | -0.6507646              | 0.598               | 0.668               | 1.04                    | ND         |    |
|                                       |                                       | Lims1     | chr10:57718903-57820045                  | cell-cell adhesion, cell-matrix adhesion                                                                 | 0                | 7.08             | 1.92                 | 0.94110631       | 0.003            | 7.06             | 1.64                 | 0.71369581              | 0.434               | 1.54                | 1.14                    | ND         |    |
|                                       |                                       | Ctnnap2   |                                          |                                                                                                          |                  |                  |                      |                  |                  |                  |                      |                         |                     |                     |                         |            |    |

|                                                                             |                                                   |                                             |                            |                                                                                                                |                           |                                                                                                  |       |             |       |            |       |             |            |            |       |       |       |    |
|-----------------------------------------------------------------------------|---------------------------------------------------|---------------------------------------------|----------------------------|----------------------------------------------------------------------------------------------------------------|---------------------------|--------------------------------------------------------------------------------------------------|-------|-------------|-------|------------|-------|-------------|------------|------------|-------|-------|-------|----|
| HSALR only                                                                  | cytoskeleton and muscle contraction<br>Metabolism | Fam162a                                     | chr16:35886533-35918803    | Unknown                                                                                                        | 0.005                     | -5.52                                                                                            | -1.51 | -0.5945485  | 0.006 | -4.96      | -1.57 | -0.6507646  | 0.605      | 0.31       | 1.03  | ND    |       |    |
|                                                                             |                                                   | Setd8                                       | chr5:124700547-124722925   | chromatin modification                                                                                         | 0.007                     | -5.03                                                                                            | -1.65 | -0.722496   | 0.006 | -5.48      | -1.81 | -0.8559897  | 0.532      | 1.24       | 1.09  | ND    |       |    |
|                                                                             |                                                   | TROO1O2                                     | chr2:20617345-20625573     | Unknown                                                                                                        | 0.016                     | -3.56                                                                                            | -1.6  | -0.6780719  | 0.011 | -3.94      | -1.74 | -0.7990873  | 0.605      | 0.435      | 1.05  | ND    |       |    |
|                                                                             |                                                   | Myh2                                        | chr11:66887414-67013707    | actin binding                                                                                                  | 0.016                     | -3.54                                                                                            | -1.51 | -0.5945485  | 0.049 | 2.97       | 1.43  | 0.51601515  | 0.012      | -5.65      | -1.18 | ND    |       |    |
|                                                                             |                                                   | Miap1b                                      | chr13:100524597-100616713  | cytoskeletal regulatory protein binding                                                                        | 0                         | 6.97                                                                                             | 1.97  | 0.97819563  | 0.214 | 1.39       | 1.15  | 0.20163386  | 0.013      | 5.55       | -1.69 | ND    |       |    |
|                                                                             |                                                   | Epbp412                                     | chr10:25088272-25212851    | cortical actin cytoskeleton organization and biogenesis                                                        | 0                         | 10.3                                                                                             | 1.55  | 0.63228822  | 0.115 | -1.77      | -1.12 | -0.1634987  | 0          | 9.58       | -1.71 | ND    |       |    |
|                                                                             |                                                   | Gpr10                                       | chr10:115373258-115373258  | insulin-like growth factor receptor signaling pathway                                                          | 0                         | -8.68                                                                                            | -1.77 | -0.8237494  | 0.359 | -1.69      | -1.13 | -0.17632558 | 0          | -5.39      | -1.72 | ND    |       |    |
|                                                                             |                                                   | Kdr                                         | chr5:76214722-76280125     | growth factor binding, ATP binding, kinase activity                                                            | 0.039                     | -2.54                                                                                            | -1.68 | -0.7484612  | 0.517 | -0.0172    | -1    | 0           | 0.035      | -3.84      | -1.67 | ND    |       |    |
|                                                                             |                                                   | Sparc                                       | chr11:55237923-55263289    | transmembrane receptor protein tyrosine kinase signaling pathway                                               | 0.011                     | -3.92                                                                                            | -2.05 | -1.0356239  | 0.405 | 0.731      | 1.1   | 0.13750352  | 0          | -8.82      | -2.26 | H     |       |    |
|                                                                             |                                                   | Efn3                                        | chr3:89400878-89408806     | GPI anchor binding                                                                                             | 0.024                     | 3.38                                                                                             | 1.55  | 0.63228822  | NA    | NA         | NA    | 1.1         | 0.13750352 | 0.046      | 3.68  | -1.88 | H     |    |
|                                                                             |                                                   | DNA transcription and development           | cell cycle and development | Rgs5                                                                                                           | chr1:171492175-171530201  | G-protein coupled receptor protein signaling pathway, negative regulation of signal transduction | 0.004 | -6.68       | -1.57 | -0.6507646 | 0.184 | -1.35       | -1.09      | -0.1243281 | 0.016 | -4.98 | -1.43 | H  |
|                                                                             |                                                   |                                             |                            | Ankrd33                                                                                                        | chr15:100943788-100948056 | regulation of transcription                                                                      | 0.014 | 3.92        | 1.85  | 0.88752527 | 0.405 | 0.648       | 1.1        | 0.13750352 | 0.046 | 3.62  | -1.68 | ND |
|                                                                             |                                                   |                                             |                            | Sox17                                                                                                          | chr1:4481008-4486494      | regulation of transcription, DNA-dependent                                                       | 0.006 | 5.02        | 1.76  | 0.81557543 | NA    | NA          | NA         | 0.015      | 4.79  | -1.91 | ND    |    |
|                                                                             |                                                   |                                             |                            | Ccna1                                                                                                          | chr3:55133403-55142984    | cell cycle, cell differentiation, cell division                                                  | 0     | 9.35        | 1.9   | 0.92599942 | 0.08  | -2.04       | -1.27      | -0.3448285 | 0     | 10.3  | 2.43  | ND |
|                                                                             |                                                   |                                             |                            | Pf1f7                                                                                                          | chr3:41652353-41713406    | apoptosis, regulation of transcription                                                           | 0.028 | 3.28        | 2.22  | 1.15055968 | 0.016 | -3.82       | -1.28      | -0.3334237 | 0.04  | 3.9   | 3.11  | ND |
| Eng                                                                         | chr2:32486803-32504124                            |                                             |                            | heart development, regulation of transforming growth factor beta receptor signaling pathway, cell adhesion     | 0                         | -7                                                                                               | -1.6  | -0.6780719  | 0.242 | -1.15      | -1.06 | -0.0840643  | 0.012      | -6.37      | -1.51 | ND    |       |    |
| Tgfb3                                                                       | chr12:86945846-86967637                           |                                             |                            | embryonic development                                                                                          | 0.004                     | 5.22                                                                                             | 1.74  | 0.79908731  | 0.242 | 1.3        | 1.09  | 0.12432814  | 0.022      | 4.77       | -1.58 | ND    |       |    |
| Tlbs1                                                                       | chr2:117803362-117818573                          |                                             |                            | inflammatory response, negative regulation of angiogenesis, cell adhesion                                      | 0.005                     | -5.38                                                                                            | -1.51 | -0.5945485  | 0.332 | 0.932      | 1.06  | 0.08406426  | 0.012      | -6.77      | -1.61 | ND    |       |    |
| Lox                                                                         | chr18:52841435-52855072                           |                                             |                            | blood vessel development, collagen fibril organization                                                         | 0.016                     | -3.48                                                                                            | -2.22 | -1.1505597  | 0.155 | 1.66       | 1.26  | 0.33342373  | 0.012      | -5.7       | -2.81 | ND    |       |    |
| Fbln5                                                                       | chr12:102147614-102220141                         |                                             |                            | cell adhesion                                                                                                  | 0.005                     | -5.52                                                                                            | -1.67 | -0.7398481  | 0.524 | 0.136      | 1     | 0           | 0          | -7.56      | -1.68 | H     |       |    |
| Nid1                                                                        | chr13:13229816-13304386                           |                                             |                            | cell-matrix adhesion, glomerular basement membrane development, cell adhesion                                  | 0.016                     | -3.56                                                                                            | -1.55 | -0.6322882  | 0.527 | 0.103      | 1.01  | 0.01435529  | 0.04       | -3.66      | -1.57 | ND    |       |    |
| Tlbs2                                                                       | chr17:14403750-14430687                           |                                             |                            | ECM-receptor interaction, Focal adhesion, TGF-beta signaling pathway                                           | 0.011                     | -3.89                                                                                            | -1.84 | -0.8797058  | 0.508 | 0.225      | 1.02  | 0.02856915  | 0.022      | -4.59      | -1.87 | ND    |       |    |
| Cot1s1                                                                      | chr4:47229292-47324354                            |                                             |                            | structural molecule activity, extracellular matrix structural constituent conferring tensile strength          | 0.005                     | -5.53                                                                                            | -1.75 | -0.8073549  | 0.359 | 0.853      | 1.1   | 0.13750352  | 0.028      | -4.18      | -1.93 | ND    |       |    |
| Fbn1                                                                        | chr2:12492035-125197879                           |                                             |                            | extracellular matrix structural constituent                                                                    | 0.018                     | -3.39                                                                                            | -1.53 | -0.6153317  | 0.096 | 2.2        | 1.29  | 0.36737107  | 0.028      | -4.2       | -1.98 | H     |       |    |
| Cot1a2                                                                      | chr6:4455696-4491543                              |                                             |                            | extracellular matrix structural constituent                                                                    | 0.021                     | -3.17                                                                                            | -2.12 | -1.0840643  | 0.458 | 0.49       | 1.1   | 0.13750352  | 0.028      | -4.21      | -2.33 | H     |       |    |
| Cot1a1                                                                      | chr11:94752359-94767937                           | extracellular matrix structural constituent | 0.018                      | -3.43                                                                                                          | -2.63                     | -1.3950628                                                                                       | 0.441 | 0.829       | 1.1   | 0.13750352 | 0     | -7.75       | -2.91      | ND         |       |       |       |    |
| Ein                                                                         | chr5:134987222-135031891                          | extracellular matrix structural constituent | 0.007                      | -4.76                                                                                                          | -1.56                     | -0.641546                                                                                        | 0.155 | 1.73        | 1.19  | 0.25096157 | 0.022 | -4.75       | -1.87      | H          |       |       |       |    |
| Tnc                                                                         | chr4:63446148-63507087                            | fibronectin binding, protein binding        | 0.024                      | -2.97                                                                                                          | -1.53                     | -0.6135317                                                                                       | 0.08  | 2.3         | 1.29  | 0.36737107 | 0.012 | -5.83       | -1.98      | ND         |       |       |       |    |
| Others                                                                      | cell cycle and development                        | Serpinb6a                                   | chr13:33925391-34010149    | Unknown                                                                                                        | 0                         | 12.9                                                                                             | 1.79  | 0.83995959  | 0.096 | 2.19       | 1.18  | 0.23878686  | 0.007      | 6.21       | 1.51  | ND    |       |    |
|                                                                             |                                                   | Ccdc80                                      | chr16:45012875-45047256    | Unknown                                                                                                        | 0.021                     | -3.14                                                                                            | -1.55 | -0.6322882  | 0.508 | -0.088     | -1.01 | -0.0143553  | 0.015      | -5.45      | -1.53 | ND    |       |    |
|                                                                             |                                                   | Syne1                                       | chr10:4795848-5000302      | Connects nuclei to the cytoskeleton by interacting with the nuclear envelope and with F-actin in the cytoplasm | 0.006                     | 4.69                                                                                             | 1.71  | 0.77399633  | 0.306 | 1.06       | 1.08  | 0.11103131  | 0.04       | 3.85       | 1.57  | ND    |       |    |
|                                                                             |                                                   | Samsn1                                      | chr16:75741473-75791946    | phosphotyrosine binding                                                                                        | 0.003                     | 6.23                                                                                             | 1.53  | 0.61353165  | 0.275 | -1.01      | -1.16 | -0.2141248  | 0.025      | 4.53       | 1.79  | ND    |       |    |
|                                                                             |                                                   | C1qc                                        | chr4:136161877-136164990   | complement activation, complement activation                                                                   | 0.034                     | -2.7                                                                                             | -1.52 | -0.6040713  | 0.115 | 2.03       | 1.24  | 0.31034012  | 0.012      | -5.99      | -1.19 | ND    |       |    |
|                                                                             |                                                   | Fmod                                        | chr1:135853925-135865298   | protein binding, transferase activity                                                                          | 0.014                     | -3.78                                                                                            | -2.06 | -1.0426443  | 0.332 | -0.825     | -1.07 | -0.0976108  | 0.044      | -3.54      | -1.91 | ND    |       |    |
|                                                                             |                                                   | Tnfrsd                                      | chrX:129197357-129211925   | Unknown                                                                                                        | 0.01                      | -4.13                                                                                            | -1.79 | -0.83995959 | 0.275 | 1.2        | 1.12  | 0.16349873  | 0.012      | -5.91      | -2.02 | ND    |       |    |
|                                                                             |                                                   | Kera                                        | chr10:97036896-97043375    | protein binding, transferase activity                                                                          | 0.007                     | -4.91                                                                                            | -2.89 | -1.5310695  | 0.405 | -0.537     | -1.07 | -0.0976108  | 0.028      | -4.24      | -2.68 | H     |       |    |
|                                                                             |                                                   | Tm4sf1                                      | chr3:57374992-57389848     | Unknown                                                                                                        | 0.011                     | 4.06                                                                                             | 3.33  | 1.73552218  | 0.359 | 0.857      | 1.06  | 0.08406426  | 0.031      | 4.17       | 3.49  | ND    |       |    |
|                                                                             |                                                   | Nkfbiz                                      | chr16:55736328-55763805    | inflammatory response, regulation of transcription                                                             | 0                         | 12.9                                                                                             | 5.22  | 2.38404981  | 0.066 | 2.72       | 1.35  | 0.43295941  | 0          | 11.2       | 3.14  | ND    |       |    |
|                                                                             |                                                   | Gjb6                                        | chr14:56077413-56087687    | protein binding, gap junction channel activity                                                                 | 0.004                     | 5.25                                                                                             | 1.55  | 0.63228822  | 0.242 | -1.12      | -1.11 | -0.1505597  | 0.013      | 5.41       | 1.58  | ND    |       |    |
|                                                                             |                                                   | Alg1f1                                      | chr1:89597241-89623593     | autophagy, protein transport                                                                                   | 0                         | 7.29                                                                                             | 3.85  | 1.94485845  | NA    | NA         | NA    | 0           | 7.29       | 3.95       | ND    |       |       |    |
|                                                                             |                                                   | Psm9                                        | chr17:33792386-33797618    | ubiquitin-dependent protein catabolic process                                                                  | 0                         | 9.51                                                                                             | 3.98  | 1.99276943  | NA    | NA         | NA    | 0           | 9.82       | 4.54       | ND    |       |       |    |
|                                                                             |                                                   | Plaz212a                                    | chr3:129870652-129887833   | lipid catabolic process, phospholipid metabolic process, lipid catabolism                                      | 0.011                     | 3.97                                                                                             | 1.33  | 0.41142825  | 0.005 | 5.87       | 2.13  | 1.09085343  | 0.031      | -3.95      | -1.6  | ND    |       |    |
|                                                                             |                                                   | MBNL1 only                                  | cell cycle and development | Tlbs4                                                                                                          | chr13:93852338-93895511   | cell adhesion                                                                                    | 0.063 | -2.03       | -1.47 | -0.558162  | 0.023 | 3.8         | 1.55       | 0.63228822 | 0.025 | -4.4  | -2.28 | ND |
| Nbt1                                                                        | chr4:138054367-138364968                          |                                             |                            | cell cycle, negative regulation of progression through cell cycle                                              | 0.238                     | -0.857                                                                                           | -1.08 | -0.1110313  | 0.027 | 3.72       | 2.24  | 1.16349873  | 0.04       | -3.75      | -2.32 | ND    |       |    |
| BCO11467                                                                    | chr11:72267832-72306115                           |                                             |                            | Unknown                                                                                                        | 0.193                     | 1.9                                                                                              | 1.2   | 0.26303441  | 0.011 | -4.16      | -1.5  | -0.5849625  | 0.007      | 6.62       | 1.8   | ND    |       |    |
| Bgn                                                                         | chrX:69736363-69748649                            |                                             |                            | protein binding, transferase activity                                                                          | 0.17                      | -1.21                                                                                            | -1.18 | -0.2387869  | 0.009 | 5.21       | 1.79  | 0.83995959  | 0.012      | -6.35      | -2.09 | ND    |       |    |
| H19                                                                         | chr7:142385072-142385908                          |                                             |                            | Unknown                                                                                                        | 0.332                     | -0.453                                                                                           | -1.05 | -0.0703993  | 0.003 | 6.75       | 1.98  | 0.98550043  | 0          | -10.1      | -2.09 | ND    |       |    |
| Egln3                                                                       | chr12:55100807-55125474                           |                                             |                            | Unknown                                                                                                        | 0.332                     | -0.296                                                                                           | -1.03 | -0.0426443  | 0.036 | -2.85      | -1.81 | -0.6870607  | 0          | 7.25       | -1.56 | ND    |       |    |
| <b>Additional validation beyond cutoff ( q&lt;0.05; Fold change&gt;1.5)</b> |                                                   |                                             |                            |                                                                                                                |                           |                                                                                                  |       |             |       |            |       |             |            |            |       |       |       |    |

| Grouping               | Gene Name  | Coordinates in 2006 mouse Genome browser | Function                                                      | HSALR-wt-q value                                                                                                          | HSALR-wt-d value | HSALR-wt-fold change | Log2FC(HS ALR-wt) | MBNL1-wt-q value | MBNL1-wt-d value | MBNL1-wt-fold change | Log2FC(MB NL1-wt) | HSALR-MBNL1-q value | HSALR-MBNL1-d value | HSALR-MBNL1-fold change | Validation |                                 |
|------------------------|------------|------------------------------------------|---------------------------------------------------------------|---------------------------------------------------------------------------------------------------------------------------|------------------|----------------------|-------------------|------------------|------------------|----------------------|-------------------|---------------------|---------------------|-------------------------|------------|---------------------------------|
| Both MBNL1KO and HSALR | Kcnab1     | chr5:6197312-65466147                    | potassium channel regulator activity                          | NA                                                                                                                        | NA               | NA                   | NA                | 0.006            | -6.29            | -10.6                | -3.4059924        | NA                  | NA                  | NA                      | O          |                                 |
|                        | Sln        | chr9:53648387-53651986                   | regulation of calcium ion transport                           | 0.034                                                                                                                     | 3.07             | 2.53                 | 1.33913738        | NA               | NA               | NA                   | NA                | 0.403               | 1.63                | 1.42                    | O          |                                 |
| HSALR only             | Aif3       | chr1:192870913-192883948                 | gluconeogenesis, regulation of transcription                  | 0                                                                                                                         | 9.15             | 3.06                 | 1.61353165        | 0.115            | 2.04             | 3.79                 | 1.92219785        | 0.46                | -0.531              | -1.23                   | O          |                                 |
|                        | Igf1       | chr10:87289928-87361590                  | insulin-like growth factor receptor binding                   | 0.021                                                                                                                     | -3.16            | -2.91                | -1.5410192        | 0.066            | -2.27            | -1.89                | -0.9183862        | 0.06                | -3.19               | -1.54                   | O          |                                 |
|                        | Acd1       | chr2:113738729-113744252                 | structural constituent of muscle                              | 0.021                                                                                                                     | -3.25            | -11.44               | -3.5160151        | 0.359            | -0.76            | -1.37                | -0.4541759        | 0.072               | -2.86               | -8.32                   | H          |                                 |
|                        | Ogn        | chr13:49620007-49636437                  | growth factor activity, protein binding, transferase activity | 0.007                                                                                                                     | -5.03            | -2.68                | -1.422233         | 0.036            | -2.78            | -1.43                | -0.5160151        | 0.028               | -4.31               | -1.87                   | H          |                                 |
|                        | Cavr1      | chr6:17256369-17291323                   | Focal adhesion                                                | 0.005                                                                                                                     | -5.73            | -1.38                | -0.4646683        | 0.524            | 0.117            | 1                    | 0                 | 0.028               | -4.27               | -1.39                   | H          |                                 |
|                        | Cot6a1     | chr10:76152507-76169760                  | Cell Communication, ECM-receptor interaction, Focal adhesion  | 0.045                                                                                                                     | -2.35            | -1.4                 | -0.854268         | 0.184            | 1.51             | 1.2                  | 0.26303441        | 0.016               | -4.77               | -1.68                   | H          |                                 |
|                        | Cdh5       | chr8:106990827-107033630                 | Cell adhesion molecules (CAMs)                                | 0.007                                                                                                                     | -5.04            | -1.21                | -0.275007         | 0.08             | 2.28             | 1.1                  | 0.13750352        | 0.016               | -5.02               | -1.34                   | H          |                                 |
|                        | Cot4a1     | chr8:11198402-11312702                   | Cell Communication, ECM-receptor interaction, Focal adhesion  | 0.024                                                                                                                     | -3.01            | -1.45                | -0.5360529        | 0.055            | 2.81             | 1.39                 | 0.47508488        | 0.012               | -6.3                | -1.91                   | H          |                                 |
|                        | Thrsp      | chr7:97288150-97292702                   | Unknown                                                       | 0.016                                                                                                                     | -3.55            | -2.23                | -1.1570437        | 0.441            | -0.358           | -1.1                 | -0.1375035        | 0.156               | -2.01               | -2.02                   | H          |                                 |
|                        | Fads1      | chr19:10250017-10263919                  | cell-cell signaling                                           | 0.016                                                                                                                     | -3.46            | -1.34                | -0.422233         | 0.486            | 0.326            | 1.02                 | 0.02856915        | 0.012               | -6.76               | -1.4                    | H          |                                 |
|                        | MBNL1 only | Crsp3                                    | chr7:48689418-48716033                                        | cellular calcium ion homeostasis, cell differentiation, multicellular organismal development, striated muscle development | 0.373            | 0.946                | 1.26              | 0.33342373       | 0.043            | 3.26                 | 3.56              | 1.83187724          | 0.06                | -3.08                   | -2.82      | U pposite direction (see Fig 5) |

**Supplementary Table 3. Grouping of expression changes in quadriceps skeletal muscle of two mouse models in the FVB background.** Fold change was determined by using microarray analysis. Altered mRNA levels identified from microarrays were divided into three groups using cutoffs (fold change  $\geq 1.5$ ): Overlapping group (*MBNLI*<sup>AE3/ΔE3</sup> vs wt  $\geq 1.5$  and *HSA*<sup>LR</sup> vs wt  $\geq 1.5$ ); *MBNLI*<sup>AE3/ΔE3</sup> only group (*MBNLI*<sup>AE3/ΔE3</sup> vs wt  $\geq 1.5$ ; *HSA*<sup>LR</sup> vs wt  $\leq 1.5$ ); *HSA*<sup>LR</sup> only group (*MBNLI*<sup>AE3/ΔE3</sup> vs wt  $\leq 1.5$ ; *HSA*<sup>LR</sup> vs wt  $\geq 1.5$ ). The events were further grouped by function acquired from Aceview. Chromosome coordinates are shown, and validation results acquired by quantitative RT-PCR are labeled with T (True) and ND (Not determined).

| Gene Name              | GO annotated genes | Enriched Go Term Group    | position                      | Function in Aceview                                                            | HSA_wt_D | HSA_wt_Q | Mbn11_wt_D | Mbn11_wt_Q | HSA_Mbn11_D | HSA_Mbn11_Q |
|------------------------|--------------------|---------------------------|-------------------------------|--------------------------------------------------------------------------------|----------|----------|------------|------------|-------------|-------------|
| 913005N14Rik(FAM114A1) |                    |                           | chr5:65,343,078-65,452,468    | unknown                                                                        | -3.20000 | 0.02100  | 0.64500    | 0.42500    | -3.52000    | 0.04400     |
| AA536717(FAM149B1)     |                    |                           | chr14:21,158,544-21,211,561   | unknown                                                                        | -2.82000 | 0.02800  | 0.05290    | 0.53000    | -4.46000    | 0.02500     |
| Acp2                   | ACP2               |                           | chr2:9,003,768-9,129,811      | lysosome organization and biogenesis, skeletal development                     | -3.22000 | 0.01800  | -0.36300   | 0.44100    | -3.57000    | 0.04400     |
| AcsL5                  | ACSL5              |                           | chr19:55,50311-55,549877      | play a key role in lipid biosynthesis and fatty acid degradation               | -4.34000 | 0.00900  | 0.34900    | 0.48600    | -4.78000    | 0.01600     |
| Actn4                  | ACTN4              |                           | chr7:28,62015-28,671,040      | actin filament bundle formation                                                | -7.06000 | 0.00000  | 1.05000    | 0.30600    | -4.43000    | 0.02500     |
| Aes                    | AES                |                           | chr10:81,020,266-81,030,878   | negative regulation of transcription, regulation of growth                     | -3.30000 | 0.01800  | -0.72500   | 0.35900    | -3.50000    | 0.04400     |
| Alb37181               |                    |                           | chr19:54,425,156-54,273,312   | Unknown                                                                        | -6.90000 | 0.00400  | -1.57000   | 0.15500    | -5.52000    | 0.01500     |
| Alx2                   |                    |                           | chr1:58,918,116-58,939,924    | activation of protein kinase activity                                          | -3.34000 | 0.00000  | -0.30100   | 0.45800    | -3.63000    | 0.04000     |
| Ap1m1                  | AP1M1              |                           | chr8:75,169,120-75,186,368    | intracellular protein transport                                                | -3.16000 | 0.02100  | -0.65400   | 0.38300    | -4.92000    | 0.01600     |
| Arhgdib                | ARHGDIIB           |                           | chr6:13,688,7904-13,690,5913  | actin cytoskeleton organization and biogenesis                                 | -4.53000 | 0.00800  | -0.27500   | 0.47300    | -3.69000    | 0.04000     |
| C1qa                   | C1QA               |                           | chr4:136,167,991-136,170,920  | tumor necrosis factor receptor binding                                         | -2.56000 | 0.03900  | -0.29400   | 0.45800    | -3.88000    | 0.03500     |
| C1qc                   | C1QC               |                           | chr4:136,167,187-136,164,990  | complement activation                                                          | -2.70000 | 0.03400  | 2.03000    | 0.11500    | -5.99000    | 0.01200     |
| Calor1                 | CALORL             |                           | chr2:84,131,467-84,177,826    | G-protein signaling                                                            | -4.10000 | 0.01000  | -1.02000   | 0.27500    | -3.45000    | 0.04600     |
| Cav1                   |                    | Vasculature               | chr6:17,256,369-17,291,323    | Focal adhesion                                                                 | -5.73000 | 0.00500  | 0.11700    | 0.52400    | -4.27000    | 0.02800     |
| Ccdc80                 | CCDC80             | ECM/adhesion              | chr16:4,501,2875-4,504,256    | unknown                                                                        | -3.14000 | 0.02100  | -0.08800   | 0.50800    | -5.45000    | 0.01500     |
| Cd47                   |                    | ECM/adhesion              | chr16:4,977,6279-4,983,1844   | integrin-mediated signaling pathway, cell adhesion                             | -2.69000 | 0.03400  | 1.02000    | 0.30600    | -3.84000    | 0.03500     |
| Cdh5                   | CDH5               | ECM/adhesion, Vasculature | chr6:10,699,0627-10,703,3630  | cell adhesion, blood vessel maturation                                         | -5.04000 | 0.00700  | 2.28000    | 0.08000    | -5.02000    | 0.01600     |
| Cdk4                   | CDK4               |                           | chr10:1,264,6663-1,264,70344  | cyclin-dependent protein kinase activity                                       | -2.97000 | 0.02400  | 1.46800    | 0.21400    | -3.78000    | 0.03500     |
| Ckm2                   | CKMT2              |                           | chr13:9,232,726-9,235,1124    | muscle contraction, generation of precursor metabolites and energy             | -4.05000 | 0.01000  | -1.89000   | 0.09600    | -3.46000    | 0.04600     |
| Col12a1                | COL12A1            | ECM/adhesion              | chr9:79,384,675-79,504,362    | extracellular matrix structural constituent conferring tensile strength        | -4.24000 | 0.00900  | -0.27400   | 0.47300    | -3.95000    | 0.03100     |
| Col15a1                | COL15A1            | ECM/adhesion              | chr4:4,729,292-4,734,265      | extracellular matrix structural constituent                                    | -5.53000 | 0.00500  | 0.85300    | 0.35900    | -4.18000    | 0.02800     |
| Col1a1                 | COL1A1             | ECM/adhesion, Vasculature | chr11:94,752,359-94,767,937   | extracellular matrix structural constituent                                    | -4.33000 | 0.01800  | 0.52900    | 0.44100    | -7.75000    | 0.00000     |
| Col1a2                 | COL1A2             | ECM/adhesion              | chr6:44,556,96-44,915,43      | extracellular matrix structural constituent                                    | -3.17000 | 0.02100  | 0.49000    | 0.45800    | -4.21000    | 0.02800     |
| Col4a1                 | COL4A1             | ECM/adhesion              | chr8:11,198,402-11,312,702    | extracellular matrix structural constituent                                    | -3.01000 | 0.02400  | 2.81000    | 0.05500    | -6.30000    | 0.01200     |
| Col6a1                 | COL6A1             | ECM/adhesion              | chr10:76,152,507-76,169,760   | extracellular matrix structural constituent                                    | -2.35000 | 0.04500  | 1.51000    | 0.18400    | -4.77000    | 0.01600     |
| Cpxm2                  | CPXM2              | ECM/adhesion              | chr7:13,187,050-13,199,3082   | cell adhesion, proteolysis                                                     | -5.57000 | 0.00500  | 0.31100    | 0.48600    | -5.20000    | 0.01600     |
| Ctcb                   | CTSB               |                           | chr14:63,735,427-63,770,624   | proteolysis                                                                    | -5.54000 | 0.00500  | 0.06350    | 0.53000    | -6.08000    | 0.01200     |
| Ctsb                   | CTSD               |                           | chr7:142,183,301-142,173,826  | proteolysis                                                                    | -3.34000 | 0.00000  | 1.19000    | 0.24200    | -3.87000    | 0.03500     |
| Ctsl                   | CTSL               |                           | chr13:6,437,7944-6,438,5196   | proteolysis                                                                    | -5.68000 | 0.00500  | 0.66400    | 0.40500    | -5.05000    | 0.01600     |
| Degs1                  | DEGS1              |                           | chr1:184,112,446-184,119,434  | fatty acid desaturation, lipid metabolic process                               | -3.25000 | 0.02100  | 1.75000    | 0.15500    | -4.45000    | 0.02500     |
| Ehd1                   | EHD1               |                           | chr19:6,276,905-6,300,098     | endocytosis, endosome transport                                                | -3.83000 | 0.01100  | -0.67700   | 0.35900    | -5.04000    | 0.01600     |
| Elh                    | ELN                | ECM/adhesion              | chr5:13,498,722-13,503,1881   | extracellular matrix constituent conferring elasticity                         | -4.76000 | 0.00700  | 1.73000    | 0.15500    | -4.75000    | 0.02200     |
| Erg1                   | ERG1               | ECM/adhesion, Vasculature | chr2:32,498,603-32,505,474    | regulation of TGF-beta receptor signaling pathway, angiogenesis, cell adhesion | -3.17000 | 0.02100  | 0.49000    | 0.45800    | -4.21000    | 0.02800     |
| Fads1                  | FADS1              |                           | chr19:10,250,017-10,263,919   | oxido-reductase activity                                                       | -3.46000 | 0.01600  | 0.32600    | 0.48600    | -6.76000    | 0.01200     |
| Fbln5                  | FBLN5              | ECM/adhesion              | chr12:10,214,7614-10,222,0141 | cell-matrix adhesion                                                           | -5.52000 | 0.00500  | 0.13600    | 0.52400    | -7.56000    | 0.00000     |
| Fbn1                   | FBN1               | ECM/adhesion              | chr2:12,499,2035-12,519,7879  | extracellular matrix structural constituent                                    | -3.39000 | 0.01800  | 2.20000    | 0.09600    | -4.20000    | 0.02800     |
| Fmod                   | FMOD               | ECM/adhesion              | chr1:13,585,3925-13,586,5298  | transforming growth factor beta receptor complex assembly                      | -3.78000 | 0.01400  | -0.82500   | 0.33200    | -3.54000    | 0.04400     |
| Fstl1                  | FSTL1              | ECM/adhesion              | chr16:37,696,293-37,757,553   | calcium ion binding, heparin binding                                           | -2.45000 | 0.04500  | -2.93000   | 0.05500    | -4.88000    | 0.00000     |
| Fzd4                   | FZD4               |                           | chr7:8,927,9585-8,928,5277    | Wnt receptor activity                                                          | -2.48000 | 0.03900  | 0.61400    | 0.42500    | -3.42000    | 0.04600     |
| G3bp2                  | G3BP2              |                           | chr5:93,127,345-93,212,766    | cytoplasmic sequestering of NF-kappa-B, Ras protein signal transduction        | -2.91000 | 0.02800  | 0.80900    | 0.38300    | -4.06000    | 0.02900     |
| Gnai2                  | GNAI2              |                           | chr9:10,747,238-10,749,3443   | GTPase activity                                                                | -3.23000 | 0.02100  | 2.40000    | 0.08000    | -6.49000    | 0.01200     |
| Gng12                  | GNNG12             |                           | chr6:66,263,033-66,950,872    | signal transduction                                                            | -3.19000 | 0.02100  | 1.26000    | 0.24200    | -3.82000    | 0.03500     |
| Grsb10                 | GRSB10             |                           | chr11:11,830,510-11,837,358   | cell-cell signaling, insulin receptor signaling pathway                        | -3.69000 | 0.00000  | -1.69000   | 0.13300    | -3.99000    | 0.00000     |
| Gtppb1                 | GTBPB1             |                           | chr15:7,951,8150-7,954,8733   | GTP binding, GTPase activity                                                   | -5.07000 | 0.00700  | 0.17100    | 0.51700    | -4.74000    | 0.02200     |
| Ifi30                  | IFI30              |                           | chr8:7,369,1761-7,369,5899    | phosphatidylinositol 3-kinase activity                                         | -3.18000 | 0.02100  | -0.71600   | 0.35900    | -7.08000    | 0.01200     |
| Ifngr1                 | IFNGR1             |                           | chr10:19,281,373-19,299,641   | signal transduction                                                            | -3.38000 | 0.00500  | -1.71000   | 0.13300    | -3.98000    | 0.03100     |
| Inca1                  | ISLR               |                           | chr11:7,050,4555-7,051,6350   | regulation of transcription                                                    | -2.35000 | 0.04500  | 1.02000    | 0.30600    | -4.74000    | 0.02200     |
| Kdr                    | KDR                | Vasculature               | chr9:57,954,409-57,957,279    | cell adhesion                                                                  | -4.80000 | 0.00900  | -1.24000   | 0.34900    | -3.94000    | 0.01200     |
| Kera                   | KERA               | ECM/adhesion              | chr5:7,621,4972-7,626,0125    | angiogenesis                                                                   | -2.54000 | 0.03900  | -0.01720   | 0.51700    | -3.84000    | 0.03500     |
| Lgals9                 | LGALS9             |                           | chr10:97,036,896-97,043,375   | response to stimulus, visual perception                                        | -4.91000 | 0.00700  | -0.53700   | 0.40500    | -4.24000    | 0.02800     |
| Lipe                   | LIFE               |                           | chr11:7,877,9351-7,880,1067   | intracellular signaling cascade                                                | -4.36000 | 0.00900  | 2.46000    | 0.08000    | -6.24000    | 0.01200     |
| Lipe                   | LIFE               |                           | chr7:25,088,286-25,105,061    | acylglycerol lipase activity                                                   | -3.20000 | 0.02100  | -1.47000   | 0.15500    | -3.36000    | 0.04600     |
| Lmx1                   | LXK                | ECM/adhesion, Vasculature | chr18:3,284,1435-3,285,5072   | copper ion binding, protein-lysine 6-oxidase activity                          | -3.48000 | 0.01600  | 1.66000    | 0.15500    | -4.70000    | 0.00000     |
| Mag3                   | MAG3               |                           | chr3:10,414,325-10,434,9088   | apoptosis, intracellular signaling cascade                                     | -4.49000 | 0.00900  | -1.33000   | 0.18400    | -3.96000    | 0.03100     |
| Map4k4                 | MAP4K4             |                           | chr1:3,984,575-3,997,0628     | ATP binding, protein serine/threonine kinase activity                          | -2.45000 | 0.04500  | 2.12000    | 0.09600    | -3.83000    | 0.03500     |
| Mmp2                   | MMP2               | ECM/adhesion, Vasculature | chr8:95,716,455-95,742,547    | proteolysis, blood vessel maturation, collagen catabolic process               | -2.48000 | 0.03900  | 2.92000    | 0.05500    | -4.57000    | 0.02200     |
| Msn                    | MSN                |                           | chrX:9,229,763-9,237,1271     | structural constituent of cytoskeleton                                         | -3.21000 | 0.02100  | 0.51900    | 0.44100    | -3.37000    | 0.04600     |
| Myk                    | MYLK               |                           | chr16:34,655,620-34,643,781   | myosin light chain kinase activity, signal transducer activity                 | -4.35000 | 0.00900  | 0.27000    | 0.49800    | -6.11000    | 0.01200     |
| Nid1                   | NID1               | ECM/adhesion              | chr13:1,322,9816-1,330,4386   | extracellular matrix structural constituent                                    | -5.56000 | 0.01600  | 0.10300    | 0.52700    | -3.66000    | 0.04000     |
| Nr2f2                  | NR2F2              | Vasculature               | chr7:7,022,5462-7,024,0259    | lipid metabolic process                                                        | -3.44000 | 0.01800  | -1.35000   | 0.18400    | -3.49000    | 0.04400     |
| Nrp1                   | NRP1               | ECM/adhesion, Vasculature | chr8:13,124,529-13,138,9437   | vascular endothelial growth factor receptor activity                           | -3.44000 | 0.01800  | -0.64800   | 0.38300    | -6.05000    | 0.01200     |
| Oxd1                   | OXCT1              |                           | chr15:3,976,494-4,105,341     | metabolic process                                                              | -4.33000 | 0.00900  | -2.26000   | 0.06600    | -4.97000    | 0.01600     |
| Parva                  | PARVA              | ECM/adhesion              | chr7:11,221,8886-11,232,868   | cell adhesion                                                                  | -3.21000 | 0.02100  | -0.68600   | 0.35900    | -3.91000    | 0.03500     |
| Pdlim1                 | PDLIM1             |                           | chr19:4,027,5550-4,032,4844   | response to oxidative stress, regulation of transcription                      | -2.36000 | 0.04500  | 1.25000    | 0.24200    | -3.45000    | 0.04600     |
| Pecam1                 | PECAM1             | ECM/adhesion              | chr11:10,647,0307-10,653,1371 | Cell adhesion molecules (CAMs)                                                 | -3.20000 | 0.02100  | 1.55000    | 0.18400    | -5.93000    | 0.01200     |
| Plod1                  | PLOD1              | ECM/adhesion              | chr4:146,753,861-146,780,504  | electron transport                                                             | -3.92000 | 0.01100  | -0.37800   | 0.44100    | -4.57000    | 0.02200     |
| Pmp22                  | PMP22              |                           | chr11:62,945,330-62,975,741   | negative regulation of cell proliferation                                      | -2.91000 | 0.02800  | 1.61000    | 0.18400    | -3.62000    | 0.04400     |
| Ppsn                   | PPSTN              | ECM/adhesion              | chr3:54,490,953-54,479,980    | cell adhesion                                                                  | -3.71000 | 0.01400  | 2.01000    | 0.11500    | -6.12000    | 0.01200     |
| PrkcsH                 | PRKCSH             |                           | chr9:21,753,436-21,764,623    | protein kinase cascade                                                         | -2.52000 | 0.03900  | 1.16000    | 0.27500    | -3.92000    | 0.03500     |
| Pygl                   | PYGL               |                           | chr12:7,110,9416-7,114,9590   | glycogen phosphorylase activity                                                | -4.69000 | 0.00700  | -0.93800   | 0.30600    | -4.24000    | 0.02800     |
| Rab31l1                | RAB31L1            |                           | chr19:10,082,123-10,105,396   | protein binding, Rab guanyl-nucleotide exchange factor activity                | -2.79000 | 0.02800  | 0.02500    | 0.53000    | -3.85000    | 0.03500     |
| Rangap1                | RANGAP1            |                           | chr15:8,153,1508-8,157,2551   | Ran GTPase activator activity                                                  | -2.73000 | 0.03400  | -1.50000   | 0.15500    | -3.49000    | 0.04400     |
| Rgl1                   | RGL1               |                           | chr11:15,427,9748-15,437,299  | regulation of small GTPase mediated signal transduction                        | -3.50000 | 0.00900  | -1.84000   | 0.34900    | -4.50000    | 0.00000     |
| Rgs5                   | RGS5               |                           | chr17:17,149,2175-17,153,0201 | GTPase activator activity                                                      | -6.68000 | 0.00400  | -1.35000   | 0.18400    | -4.98000    | 0.01600     |
| Rxb                    | RXRb               |                           | chr17:3,364,2305-3,364,8847   | regulation of transcription                                                    | -4.21000 | 0.00900  | 0.13100    | 0.52400    | -3.35000    | 0.04600     |
| Scotin                 | SEPT8              |                           | chr9:10,889,6032-10,891,5172  | positive regulation of I-kappa-B kinase/NF-kappa-B cascade                     | -3.00000 | 0.02400  | 1.23000    | 0.24200    | -4.16000    | 0.02900     |
| Serp8                  | SERPINF1           | Vasculature               | chr11:53,362,222-53,387,521   | cell cycle                                                                     | -5.37000 | 0.00500  | 1.03000    | 0.30600    | -9.76000    | 0.00000     |
| Sh3bp1                 | SH3BP1             |                           | chr11:75,222,825-75,232,981   | negative regulation of angiogenesis                                            | -3.51000 | 0.01100  | 0.90000    | 0.35900    | -4.15000    | 0.00000     |
| Slc25a39               | SLC25A39           |                           | chrX:15,497,1741-15,531,8272  | cell-cell signaling                                                            | -3.46000 | 0.01600  | -0.02510   | 0.51700    | -4.08000    | 0.02900     |
| Slc3a2                 | SLC3A2             |                           | chr11:10,221,8162-10,222,4015 | transport                                                                      | -5.09000 | 0.00700  | -0.13300   | 0.49800    | -4.27000    | 0.02800     |

**Supplementary Table 4. List of 93 transcripts (class II genes) that are significantly down-regulated in *HSA*<sup>LR</sup> mice, but not in *MBNL1*<sup>ΔE3/ΔE3</sup> mice.** This class of genes was obtained as described in the text.

| inputGenes       | GO ID | Total genes with GO term | # Genes Changed | P-Value | FDR    | GO Term                                                                  |
|------------------|-------|--------------------------|-----------------|---------|--------|--------------------------------------------------------------------------|
| Smox -1          | 19318 | 119                      | 9               | 0.0001  | 0.0001 | 0.0112 hexose metabolic process                                          |
| Igfbp5 -1        | 43292 | 67                       | 7               | 0.0001  | 0.0001 | 0.0114 contractile fiber                                                 |
| Igf1 -1          | 6094  | 29                       | 5               | 0.0001  | 0.0001 | 0.0133 gluconeogenesis                                                   |
| Pi16 -1          | 1649  | 34                       | 5               | 0.0002  | 0.0002 | 0.0158 osteoblast differentiation                                        |
| Pikfb3 -1        | 50789 | 2746                     | 62              | 0.0001  | 0.0001 | 0.016 regulation of biological process                                   |
| Zfp289 -1        | 46364 | 35                       | 5               | 0.0002  | 0.0002 | 0.0162 monosaccharide biosynthetic process                               |
| Pdlim7 -1        | 6006  | 100                      | 8               | 0.0002  | 0.0002 | 0.0173 glucose metabolic process                                         |
| Grem2 -1         | 19319 | 33                       | 5               | 0.0001  | 0.0001 | 0.019 hexose biosynthetic process                                        |
| Casp12 -1        | 48009 | 12                       | 4               | 0       | 0      | 0.02 insulin-like growth factor receptor signaling pathway               |
| Acvr2a -1        | 30016 | 64                       | 7               | 0.0001  | 0.0001 | 0.02 myofibril                                                           |
| Pla2g7 -1        | 7167  | 237                      | 13              | 0.0001  | 0.0001 | 0.02 enzyme linked receptor protein signaling pathway                    |
| Amotl1 -1        | 5996  | 124                      | 9               | 0.0001  | 0.0001 | 0.02 monosaccharide metabolic process                                    |
| Ace -1           | 7154  | 1475                     | 39              | 0.0002  | 0.0002 | 0.02 cell communication                                                  |
| Centb5 -1        | 1558  | 92                       | 7               | 0.0006  | 0.0006 | 0.0341 regulation of cell growth                                         |
| Fermt3 -1        | 30334 | 92                       | 7               | 0.0006  | 0.0006 | 0.0341 regulation of cell migration                                      |
| Sort1 -1         | 7517  | 183                      | 10              | 0.0006  | 0.0006 | 0.035 muscle development                                                 |
| Cd82 -1          | 14909 | 11                       | 3               | 0.0006  | 0.0006 | 0.0354 smooth muscle cell migration                                      |
| Mod1 -1          | 46165 | 40                       | 5               | 0.0004  | 0.0004 | 0.0358 alcohol biosynthetic process                                      |
| Htra1 -1         | 51094 | 288                      | 13              | 0.0005  | 0.0005 | 0.0358 positive regulation of developmental process                      |
| Rxrg -1          | 34103 | 45                       | 5               | 0.0007  | 0.0007 | 0.0358 regulation of tissue remodeling                                   |
| Aco7 -1          | 7166  | 573                      | 20              | 0.0005  | 0.0005 | 0.036 cell surface receptor linked signal transduction                   |
| Sra1 -1          | 45667 | 21                       | 4               | 0.0003  | 0.0003 | 0.0364 regulation of osteoblast differentiation                          |
| Gdf8 -1          | 44449 | 61                       | 6               | 0.0004  | 0.0004 | 0.0368 contractile fiber part                                            |
| Tnnc1 -1         | 19838 | 58                       | 6               | 0.0003  | 0.0003 | 0.0371 growth factor binding                                             |
| Tsku -1          | 10675 | 24                       | 4               | 0.0005  | 0.0005 | 0.0372 regulation of cellular carbohydrate metabolic process             |
| Csnk1d -1        | 46850 | 42                       | 5               | 0.0005  | 0.0005 | 0.0375 regulation of bone remodeling                                     |
| Smad3 -1         | 7165  | 1287                     | 35              | 0.0004  | 0.0004 | 0.0379 signal transduction                                               |
| Cntrf -1         | 14910 | 10                       | 3               | 0.0004  | 0.0004 | 0.0381 regulation of smooth muscle cell migration                        |
| Lta4h -1         | 6090  | 37                       | 5               | 0.0003  | 0.0003 | 0.039 pyruvate metabolic process                                         |
| Rap2ip -1        | 34637 | 85                       | 7               | 0.0004  | 0.0004 | 0.0396 cellular carbohydrate biosynthetic process                        |
| Il1r2 -1         | 43567 | 4                        | 3               | 0       | 0      | 0.04 regulation of insulin-like growth factor receptor signaling pathway |
| Laptn4b -1       | 19563 | 2                        | 2               | 0.0002  | 0.0002 | 0.0411 glycerol catabolic process                                        |
| Setd8 -1         | 46168 | 2                        | 2               | 0.0002  | 0.0002 | 0.0411 glycerol-3-phosphate catabolic process                            |
| Nfil3 -1         | 4367  | 2                        | 2               | 0.0002  | 0.0002 | 0.0411 glycerol-3-phosphate dehydrogenase (NAD+) activity                |
| Ppfi4 -1         | 4368  | 2                        | 2               | 0.0002  | 0.0002 | 0.0411 glycerol-3-phosphate dehydrogenase activity                       |
| Pkccc -1         | 9331  | 2                        | 2               | 0.0002  | 0.0002 | 0.0411 glycerol-3-phosphate dehydrogenase complex                        |
| Rock2 -1         | 3700  | 389                      | 15              | 0.001   | 0.001  | 0.044 transcription factor activity                                      |
| Tnni1 -1         | 6071  | 13                       | 3               | 0.001   | 0.001  | 0.0448 glycerol metabolic process                                        |
| Gpd1 -1          | 10463 | 13                       | 3               | 0.001   | 0.001  | 0.0448 mesenchymal cell proliferation                                    |
| Calm3 -1         | 10464 | 13                       | 3               | 0.001   | 0.001  | 0.0448 regulation of mesenchymal cell proliferation                      |
| Calm1 -1         | 30335 | 48                       | 5               | 0.0009  | 0.0009 | 0.045 positive regulation of cell migration                              |
| Asb5 -1          | 8284  | 162                      | 9               | 0.001   | 0.001  | 0.0451 positive regulation of cell proliferation                         |
| Ploc4 -1         | 16051 | 98                       | 7               | 0.0008  | 0.0008 | 0.046 carbohydrate biosynthetic process                                  |
| Sox18 -1         | 65007 | 2938                     | 62              | 0.0008  | 0.0008 | 0.0467 biological regulation                                             |
| Pdrg1 -1         | 42221 | 711                      | 22              | 0.0013  | 0.0013 | 0.0473 response to chemical stimulus                                     |
| 1700001022Rik -1 | 46849 | 53                       | 5               | 0.0014  | 0.0014 | 0.0473 bone remodeling                                                   |
| Irs1 -1          | 51272 | 53                       | 5               | 0.0014  | 0.0014 | 0.0473 positive regulation of cell motion                                |
| Cd74 -1          | 6109  | 27                       | 4               | 0.0008  | 0.0008 | 0.0478 regulation of carbohydrate metabolic process                      |
| Chm -1           | 5520  | 12                       | 3               | 0.0008  | 0.0008 | 0.048 insulin-like growth factor binding                                 |
| Myoz2 -1         | 14812 | 12                       | 3               | 0.0008  | 0.0008 | 0.048 muscle cell migration                                              |
| Khk -1           | 45766 | 12                       | 3               | 0.0008  | 0.0008 | 0.048 positive regulation of angiogenesis                                |
| Lpin1 -1         | 2053  | 12                       | 3               | 0.0008  | 0.0008 | 0.048 positive regulation of mesenchymal cell proliferation              |
| Btaf1 -1         | 40012 | 105                      | 7               | 0.0013  | 0.0013 | 0.0482 regulation of locomotion                                          |
| Msrb3 -1         | 14706 | 137                      | 8               | 0.0013  | 0.0013 | 0.0486 striated muscle development                                       |
| Cugbp2 -1        | 10906 | 14                       | 3               | 0.0012  | 0.0012 | 0.0491 regulation of glucose metabolic process                           |
| Anapc13 -1       |       |                          |                 |         |        |                                                                          |
| Klhdc6 -1        |       |                          |                 |         |        |                                                                          |
| Myl2 -1          |       |                          |                 |         |        |                                                                          |
| Snx3 -1          |       |                          |                 |         |        |                                                                          |
| Pacs2 -1         |       |                          |                 |         |        |                                                                          |
| Cox8b -1         |       |                          |                 |         |        |                                                                          |
| Gpd2 -1          |       |                          |                 |         |        |                                                                          |
| Fam162a -1       |       |                          |                 |         |        |                                                                          |
| Vegfa -1         |       |                          |                 |         |        |                                                                          |
| Kcnab1 -1        |       |                          |                 |         |        |                                                                          |
| Hlx1 1           |       |                          |                 |         |        |                                                                          |
| Arl6ip5 1        |       |                          |                 |         |        |                                                                          |
| Cdkn1a 1         |       |                          |                 |         |        |                                                                          |
| Nrap 1           |       |                          |                 |         |        |                                                                          |
| Slc8a3 1         |       |                          |                 |         |        |                                                                          |
| Cyr61 1          |       |                          |                 |         |        |                                                                          |
| Mb 1             |       |                          |                 |         |        |                                                                          |
| Ucp2 1           |       |                          |                 |         |        |                                                                          |
| Slc47a1 1        |       |                          |                 |         |        |                                                                          |
| Zfp106 1         |       |                          |                 |         |        |                                                                          |
| Smtnl1 1         |       |                          |                 |         |        |                                                                          |
| Irf5 1           |       |                          |                 |         |        |                                                                          |
| Kif5 1           |       |                          |                 |         |        |                                                                          |
| Dok5 1           |       |                          |                 |         |        |                                                                          |
| Nfatc2 1         |       |                          |                 |         |        |                                                                          |
| Lims1 1          |       |                          |                 |         |        |                                                                          |
| Atp1b4 1         |       |                          |                 |         |        |                                                                          |
| Pdlim3 1         |       |                          |                 |         |        |                                                                          |
| Tnfrsf19 1       |       |                          |                 |         |        |                                                                          |
| Trp63 1          |       |                          |                 |         |        |                                                                          |
| Ccndbp1 1        |       |                          |                 |         |        |                                                                          |
| Cacng1 1         |       |                          |                 |         |        |                                                                          |
| Runx1 1          |       |                          |                 |         |        |                                                                          |
| Cntnap2 1        |       |                          |                 |         |        |                                                                          |
| Gadd45b 1        |       |                          |                 |         |        |                                                                          |
| Sln 1            |       |                          |                 |         |        |                                                                          |
| Fhl1 1           |       |                          |                 |         |        |                                                                          |
| Atrnl1 1         |       |                          |                 |         |        |                                                                          |
| Ctnna3 1         |       |                          |                 |         |        |                                                                          |
| Prepl 1          |       |                          |                 |         |        |                                                                          |
| Atf3 1           |       |                          |                 |         |        |                                                                          |
| Hspb7 1          |       |                          |                 |         |        |                                                                          |
| Plekha1 1        |       |                          |                 |         |        |                                                                          |
| Phlda3 1         |       |                          |                 |         |        |                                                                          |
| Tbc1d1 1         |       |                          |                 |         |        |                                                                          |
| Cilp 1           |       |                          |                 |         |        |                                                                          |
| Fbp2 1           |       |                          |                 |         |        |                                                                          |



**Supplementary Table 5. GO analysis for Class I genes.** Genes in Class I are listed, and their expression changes presumably arise as an indirect consequence of the loss of Mbn11 splicing factor function.

| Input Genes | GO ID | Total Genes v | # Changed Ge | P-Value | FDR    | Term                                                           | Group        |
|-------------|-------|---------------|--------------|---------|--------|----------------------------------------------------------------|--------------|
| ACP2        | 5578  | 110           | 18           | 0       | 0      | 0 proteinaceous extracellular matrix                           | ECM/adhesion |
| ACSL5       | 31012 | 112           | 18           | 0       | 0      | 0 extracellular matrix                                         | ECM/adhesion |
| ACTN4       | 44421 | 212           | 21           | 0       | 0      | 0 extracellular region part                                    | ECM/adhesion |
| AES         | 5576  | 409           | 28           | 0       | 0      | 0 extracellular region                                         | ECM/adhesion |
| AP1M1       | 44420 | 40            | 11           | 0       | 0      | 0 extracellular matrix part                                    | ECM/adhesion |
| ARHGDIB     | 22610 | 231           | 19           | 0       | 0      | 0 biological adhesion                                          | ECM/adhesion |
| C1QA        | 7155  | 231           | 19           | 0       | 0      | 0 cell adhesion                                                | ECM/adhesion |
| C1QC        | 5604  | 29            | 7            | 0       | 0      | 0 basement membrane                                            | ECM/adhesion |
| CALCRLL     | 1568  | 122           | 12           | 0       | 0      | 0 blood vessel development                                     | Vasculature  |
| CAV1        | 1944  | 125           | 12           | 0       | 0      | 0 vasculature development                                      | Vasculature  |
| CCDC80      | 48407 | 7             | 4            | 0       | 0      | 0 platelet-derived growth factor binding                       | Vasculature  |
| CD47        | 5201  | 16            | 5            | 0       | 0      | 0 extracellular matrix structural constituent                  | ECM/adhesion |
| CDH5        | 30198 | 44            | 7            | 0       | 0      | 0 extracellular matrix organization                            | ECM/adhesion |
| CDK4        | 43062 | 67            | 8            | 0       | 0      | 0 extracellular structure organization                         | ECM/adhesion |
| CKMT2       | 10810 | 19            | 5            | 0       | 0      | 0 regulation of cell-substrate adhesion                        | ECM/adhesion |
| COL12A1     | 19838 | 33            | 6            | 0       | 0      | 0 growth factor binding                                        |              |
| COL15A1     | 8201  | 36            | 6            | 0       | 0.0006 | 0.0006 heparin binding                                         | ECM/adhesion |
| COL1A1      | 10926 | 322           | 16           | 0       | 0.0006 | 0.0006 anatomical structure formation                          |              |
| COL1A2      | 5509  | 287           | 15           | 0       | 0.0005 | 0.0005 calcium ion binding                                     |              |
| COL4A1      | 5581  | 12            | 4            | 0       | 0.0005 | 0.0005 collagen                                                | ECM/adhesion |
| COL6A1      | 5515  | 2168          | 52           | 0       | 0.0005 | 0.0005 protein binding                                         |              |
| CPXM2       | 50840 | 14            | 4            | 0       | 0.0009 | 0.0009 extracellular matrix binding                            | ECM/adhesion |
| CTSB        | 10811 | 14            | 4            | 0       | 0.0009 | 0.0009 positive regulation of cell-substrate adhesion          | ECM/adhesion |
| CTSD        | 5539  | 46            | 6            | 0.0001  | 0.0008 | 0.0008 glycosaminoglycan binding                               | ECM/adhesion |
| CTSL        | 30247 | 47            | 6            | 0.0001  | 0.0016 | 0.0016 polysaccharide binding                                  | ECM/adhesion |
| DEGS1       | 1871  | 48            | 6            | 0.0001  | 0.0015 | 0.0015 pattern binding                                         |              |
| EHD1        | 48646 | 132           | 9            | 0.0002  | 0.003  | 0.003 anatomical structure formation involved in morphogenesis |              |
| ELN         | 48514 | 104           | 8            | 0.0002  | 0.0029 | 0.0029 blood vessel morphogenesis                              | Vasculature  |
| ENG         | 1955  | 2             | 2            | 0.0002  | 0.01   | 0.01 blood vessel maturation                                   | Vasculature  |
| FADS1       | 60346 | 2             | 2            | 0.0002  | 0.01   | 0.01 bone trabecula formation                                  |              |
| FBLN5       | 5584  | 2             | 2            | 0.0002  | 0.01   | 0.01 collagen type I                                           | ECM/adhesion |
| FBN1        | 1957  | 2             | 2            | 0.0002  | 0.01   | 0.01 intramembranous ossification                              |              |
| FMOD        | 30155 | 38            | 5            | 0.0002  | 0.0103 | 0.0103 regulation of cell adhesion                             |              |
| FSTL1       | 45785 | 21            | 4            | 0.0002  | 0.0106 | 0.0106 positive regulation of cell adhesion                    | ECM/adhesion |
| FZD4        | 5198  | 140           | 9            | 0.0002  | 0.0103 | 0.0103 structural molecule activity                            |              |
| G3BP2       | 31589 | 42            | 5            | 0.0004  | 0.0131 | 0.0131 cell-substrate adhesion                                 | ECM/adhesion |
| GNAI2       | 30246 | 91            | 7            | 0.0004  | 0.0127 | 0.0127 carbohydrate binding                                    |              |
| GNG12       | 1525  | 74            | 6            | 0.0008  | 0.0318 | 0.0318 angiogenesis                                            | Vasculature  |
| GRB10       | 5764  | 76            | 6            | 0.001   | 0.0335 | 0.0335 lysosome                                                |              |
| GTPBP1      | 323   | 76            | 6            | 0.001   | 0.0335 | 0.0335 lytic vacuole                                           |              |
| IFI30       |       |               |              |         |        |                                                                |              |
| IFNGR1      |       |               |              |         |        |                                                                |              |
| ISLR        |       |               |              |         |        |                                                                |              |
| KDR         |       |               |              |         |        |                                                                |              |
| KERA        |       |               |              |         |        |                                                                |              |
| LGALS9      |       |               |              |         |        |                                                                |              |
| LIPE        |       |               |              |         |        |                                                                |              |
| LOX         |       |               |              |         |        |                                                                |              |
| MAGI3       |       |               |              |         |        |                                                                |              |
| MAP4K4      |       |               |              |         |        |                                                                |              |
| MMP2        |       |               |              |         |        |                                                                |              |
| MSN         |       |               |              |         |        |                                                                |              |
| MYLK        |       |               |              |         |        |                                                                |              |
| NID1        |       |               |              |         |        |                                                                |              |
| NR2F2       |       |               |              |         |        |                                                                |              |
| NRP1        |       |               |              |         |        |                                                                |              |
| OXCT1       |       |               |              |         |        |                                                                |              |
| PARVA       |       |               |              |         |        |                                                                |              |
| PDLIM1      |       |               |              |         |        |                                                                |              |
| PECAM1      |       |               |              |         |        |                                                                |              |
| PLOD1       |       |               |              |         |        |                                                                |              |
| PMP22       |       |               |              |         |        |                                                                |              |
| POSTN       |       |               |              |         |        |                                                                |              |
| PRKCSH      |       |               |              |         |        |                                                                |              |
| PYGL        |       |               |              |         |        |                                                                |              |
| RAB31L1     |       |               |              |         |        |                                                                |              |
| RANGAP1     |       |               |              |         |        |                                                                |              |
| RGL1        |       |               |              |         |        |                                                                |              |
| RGS5        |       |               |              |         |        |                                                                |              |
| RXR8        |       |               |              |         |        |                                                                |              |
| SEPT8       |       |               |              |         |        |                                                                |              |
| SERPINF1    |       |               |              |         |        |                                                                |              |
| SH3KBP1     |       |               |              |         |        |                                                                |              |
| SLC25A39    |       |               |              |         |        |                                                                |              |
| SLC3A2      |       |               |              |         |        |                                                                |              |
| SMOC2       |       |               |              |         |        |                                                                |              |
| SMPD1       |       |               |              |         |        |                                                                |              |
| SPARC       |       |               |              |         |        |                                                                |              |
| SPNA2       |       |               |              |         |        |                                                                |              |
| THBS1       |       |               |              |         |        |                                                                |              |
| THBS2       |       |               |              |         |        |                                                                |              |
| TMEM62      |       |               |              |         |        |                                                                |              |
| TNC         |       |               |              |         |        |                                                                |              |
| TNFAIP2     |       |               |              |         |        |                                                                |              |
| TNMD        |       |               |              |         |        |                                                                |              |
| ZMYM1       |       |               |              |         |        |                                                                |              |

**Supplementary Table 6. GO analysis for Class II genes.** Genes in class II are listed, and their expression changes are significant down-regulated in *HSA<sup>LR</sup>* mice, but not in *MBNL1<sup>ΔE3/ΔE3</sup>* mice.

| GO annotated gene | Enriched Go Term Group    | Protein Name                                                             | Human Disease or (mouse knock out phenotype)                              | Function in ECM, cell adhesion and vasculature                                                                                                                      |
|-------------------|---------------------------|--------------------------------------------------------------------------|---------------------------------------------------------------------------|---------------------------------------------------------------------------------------------------------------------------------------------------------------------|
| CAV1              | Vasculature               | caveolin, caveolae protein 1                                             |                                                                           | Participates in focal adhesion                                                                                                                                      |
| CCDC80            | ECM/adhesion              | coiled-coil domain containing 80                                         |                                                                           | modulation of adipogenesis (PMID: 19141617)                                                                                                                         |
| CD47              | ECM/adhesion              | CD47 antigen (Rb-related antigen, integrin-associated signal transducer) |                                                                           | Receptor for thrombospondin 1 and associated with integrin, regulating nitric oxide signaling                                                                       |
| CDH5              | ECM/adhesion, Vasculature | cadherin 5                                                               |                                                                           | Transmembrane protein, mediates calcium-dependent cell-cell adhesion                                                                                                |
| COL12A1           | ECM/adhesion              | procollagen, type XII, alpha 1                                           |                                                                           | Acts as crossbridge between fibrils and resists shear forces                                                                                                        |
| COL15A1           | ECM/adhesion              | procollagen, type XV                                                     |                                                                           | Adhesion function in skeletal and cardiac muscle                                                                                                                    |
| COL1A1            | ECM/adhesion, Vasculature | procollagen, type I, alpha 1                                             | Col15a1-deficient mice have skeletal myopathy and cardiovascular defects  | Abundant, ECM organization                                                                                                                                          |
| COL1A2            | ECM/adhesion              | procollagen, type I, alpha 2                                             | osteogenesis imperfecta Type I                                            | Abundant, ECM organization                                                                                                                                          |
| COL4A1            | ECM/adhesion              | procollagen, type IV, alpha 1                                            | Familial Porencephaly; Alport syndrome                                    | ECM organization                                                                                                                                                    |
| COL6A1            | ECM/adhesion              | procollagen, type VI, alpha 1                                            | Ullrich congenital muscular dystrophy; Bethlem myopathy                   | Anchors the muscle basement to the ECM                                                                                                                              |
| CPXM2             | ECM/adhesion              | carboxypeptidase X 2 (M14 family)                                        |                                                                           | participates in cell adhesion and proteolysis                                                                                                                       |
| ELN               | ECM/adhesion              | elastin                                                                  | Supravalvular Aortic Stenosis; Williams-Beuren Syndrome                   | ECM organization                                                                                                                                                    |
| ENG               | ECM/adhesion, Vasculature | endoglin(TGF-beta type III receptor)                                     | Hereditary Hemorrhagic Telangiectasia of Rendu, Osler, and Weber          | Both the extracellular and intracellular domains of endoglin interact with TBR-II and ALK-5 and its cytoplasmic domain, which is phosphorylated by ALK-5 and TBR-II |
| FBLN5             | ECM/adhesion              | fibulin 5                                                                | Autosomal Recessive Cutis Laxa, Type I; age-related muscular degeneration | Elastin fiber formation                                                                                                                                             |
| FBN1              | ECM/adhesion              | Fibrillin-1                                                              | Marfan Syndrome                                                           | Elastin fiber assembly and formation                                                                                                                                |
| FMOD              | ECM/adhesion              | fibromodulin                                                             |                                                                           | inhibits type I collagen fibrillogenesis                                                                                                                            |
| FSTL1             | ECM/adhesion              | folistatin-like 1                                                        | Ehlers-Danlos Syndrome, Type I                                            | secreted myokine that promotes endothelial cell function and stimulates revascularization in response to ischemic insult by activating Akt-eNOS signaling.          |
| KDR               | Vasculature               | kinase insert domain protein receptor/fetal liver kinase-1 (KDR/Flk-1)   |                                                                           | Inhibits angiogenesis                                                                                                                                               |
| KERA              | ECM/adhesion              | keratocan                                                                | Cornea Plana 2                                                            | keratan sulfate proteoglycan of the extracellular matrix. Based on studies in the mouse, keratocan expression is more limited to the cornea in the adult organism.  |
| LOX               | ECM/adhesion, Vasculature | lysyl oxidase                                                            | Lox knockout mice have cardiovascular dysfunction                         | Formation and repair of the extracellular matrix (ECM) by oxidizing lysine residues in elastin and collagen                                                         |
| MMP2              | ECM/adhesion, Vasculature | matrix metalloproteinase 2                                               |                                                                           | Degradation of the extracellular matrix components and tissue remodeling                                                                                            |
| NID1              | ECM/adhesion              | nidogen 1                                                                |                                                                           | serves as link between collagen IV and laminin.                                                                                                                     |
| NR2F2             | Vasculature               | nuclear receptor subfamily 2, group F, member 2                          |                                                                           | blood vessel morphogenesis                                                                                                                                          |
| NRP1              | ECM/adhesion, Vasculature | Neuropilin-1                                                             |                                                                           | Participates in angiogenesis                                                                                                                                        |
| PARVA             | ECM/adhesion              | parvin, alpha                                                            |                                                                           | Participates in focal adhesion                                                                                                                                      |
| PECAM1            | ECM/adhesion              | platelet/endothelial cell adhesion molecule 1                            |                                                                           | participates in butanoate metabolism and synthesis and degradation of ketone bodies                                                                                 |
| PLOD1             | ECM/adhesion              | procollagen-lysine, 2-oxoglutarate 5-dioxygenase 1                       | Ehlers-Danlos syndrome type VIA, Nevo Syndrome                            | lysyl hydroxylase that controls cross-links                                                                                                                         |
| POSTN             | ECM/adhesion              | periostin, osteoblast specific factor                                    | Postn knockout mice have cardiac valve disease                            | Regulation of collagen fiber diameter and crosslinking                                                                                                              |
| SERPINF1          | Vasculature               | serine (or cysteine) peptidase inhibitor, clade F, member 1              |                                                                           | Cell proliferation and negative regulation of angiogenesis                                                                                                          |
| SMOC2             | ECM/adhesion              | SPARC related modular calcium binding 2                                  |                                                                           | Regulator of cell-matrix interactions and integrin activation                                                                                                       |
| SPARC             | ECM/adhesion              | secreted acidic cysteine rich glycoprotein                               |                                                                           | Regulator of cell-matrix interactions                                                                                                                               |
| THBS1             | ECM/adhesion, Vasculature | thrombospondin 1                                                         |                                                                           | Agonist for CD47, wound healing                                                                                                                                     |
| THBS2             | ECM/adhesion              | thrombospondin 2                                                         |                                                                           | Potent endogenous inhibitor of tumor growth and angiogenesis                                                                                                        |
| TNC               | ECM/adhesion              | tenascin C                                                               | tenascin C-deficient mice have weak muscles                               | Regulation of muscle strength                                                                                                                                       |
| TNFAIP2           | Vasculature               | tumor necrosis factor, alpha-induced protein 2                           |                                                                           | Participates in angiogenesis                                                                                                                                        |

**Supplementary Table 7. List of 40 extracellular matrix transcripts.** This is the set of class II genes labeled as functioning in extracellular space. Their positions in ECM and involvement in diseases are listed. See also Fig 6.

NB: These are the only 7mers or smaller with false discovery rates (FDR) < 0.1

| List source              | Position | 7mer motif counts | p-value    | FDR      | notes    |
|--------------------------|----------|-------------------|------------|----------|----------|
| Down Reg Class II genes  | 3'UTR    | CTCTCTC           | 1.9116E-07 | 0.003132 | PTB/nPTB |
|                          |          | GGTGCTA           | 3.6166E-06 | 0.059254 | MBNL     |
| Down Reg Class II genes  | 5'UTR    | TGCCTGC           | 2.6371E-08 | 0.000432 | MBNL     |
|                          |          | CCTGCCT           | 7.0103E-07 | 0.011486 | MBNL     |
|                          |          | TGTGCCT           | 2.3799E-06 | 0.038992 | MBNL     |
| ECM subgroup of Class II | 3'UTR    | GGTGCTA           | 7.518E-09  | 0.000123 | MBNL     |
|                          |          | GATCCAA           | 5.6486E-07 | 0.009255 | unknown  |
|                          |          | GACTATC           | 2.1134E-06 | 0.034626 | unknown  |
| ECM subgroup of Class II | 5'UTR    | CCTGCCT           | 2.2042E-10 | 3.61E-06 | MBNL     |
|                          |          | TCCCACC           | 1.8608E-07 | 0.003049 | unknown  |
|                          |          | GCACCCG           | 7.1793E-07 | 0.011763 | unknown  |

**Supplementary Table 8. Motif elements in class II genes at 3'UTR as well as 5'UTR by using Improbizer and 7mer counts. yGCy elements are underlined.**

| Gene Name          | Alternative splicing | Purpose | Primers                          | primers5'-3'                                    |
|--------------------|----------------------|---------|----------------------------------|-------------------------------------------------|
| Mouse Nfix         | altCassette(123)     | RT-PCR  | L-primer<br>R-primer             | TCGACGACAGTGGAG<br>CAAACCTCTCAGCGAGTCC          |
| Mouse Gnas         | altCassette (45)     | RT-PCR  | L-primer<br>R-primer             | GAGGATCCATGATGTTAATGG<br>ATGGCCCTCTCAGGTTGTT    |
| Mouse camk2g       | altCassette(33)      | RT-PCR  | L-primer<br>R-primer             | CTGCCAAAAGCCTATTGAAC<br>GCTGGGCTTACGAGACTGTT    |
| Mouse smyd1        | altCassette(39)      | RT-PCR  | L-primer<br>R-primer             | CTGCAACGGTTTCACTCTCA<br>CCTCGCCTTCTGAGATCTTG    |
| Mouse anxa6        | AlterCassette(18)    | RT-PCR  | L-primer<br>R-Primer             | GAAATCGAGAGGAAGGAGGAG<br>GGATAGCTACGGGTGCACAG   |
| Mouse Ppp2r5c      | AlterCassette(117)   | RT-PCR  | L-primer<br>R-Primer             | GCGAGAAGAAGCATGGGTTA<br>GACGATCCCTTTCAGCTCCT    |
| Mouse Picalm       | AlterCassette(24)    | RT-PCR  | L-primer<br>R-Primer             | TTGGAGTCAACCAGGTGAAA<br>TCATGCCCGTTGGTGTAGTA    |
| Mouse Pdlim7       | AlterCassette(119)   | RT-PCR  | L-primer<br>R-Primer             | CCTGTTCAGAGCAAACCACA<br>CTTCGGTATFCTCCATCAGC    |
| Mouse Fn1          | AlterCassette(270)   | RT-PCR  | L-primer<br>R-Primer             | GGTTCAAACCTGCAGTGACCA<br>ACTGGGCAGTAAAGCTGGTG   |
| Mouse Fn1          | AlterCassette(273)   | RT-PCR  | L-primer<br>R-Primer             | TGCCCTATCTCTGATACCG<br>CGATATTGGTGAATCGCAGA     |
| Mouse 2610103J23f  | AlterCassette(99)    | RT-PCR  | L-primer<br>R-Primer             | ATGCAAAATGGGAAAGACTGG<br>ACTCCCTCTGGTGCATTC     |
| Mouse BC060506 (S) | AlterCassette(39)    | RT-PCR  | L-primer<br>R-Primer             | TGGGTTCTCTTTCGTGAGG<br>TGTGCCATTGAACAGTAGGG     |
| Mouse Capzb        | AlterCassette(113)   | RT-PCR  | L-primer<br>R-Primer             | TGGAAAACAATAACCGAAGC<br>CCTCCACCAGGTCGTTCTTA    |
| Mouse AK035230 (F) | AlterCassette(171)   | RT-PCR  | L-primer<br>R-Primer             | AAGCACCACATCAACACCAA<br>CGTCCCTAACAGGAGTGAGGT   |
| Mouse OPA1         | AlterCassette(111)   | RT-PCR  | L-primer<br>R-Primer             | AAACAGCATTTTCGAGCAACA<br>GCAGAAGTTCTTCTGAAGTTGG |
| Mouse Mbn1         | AltExon (54)         | RT-PCR  | L-primer<br>R-Primer             | TGACTGTGCGTTTGCTCATC<br>GCATGTTGGCTAGAGCCTGT    |
| Mouse Cnda         | AltExon (207)        | RT-PCR  | L-primer<br>R-Primer             | GCCCAGATGGAGTTCCTGTA<br>TTCATCTCCCAATCTCACC     |
| Mouse Camk2g       | AltExon (63)         | RT-PCR  | L-primer<br>R-Primer             | ACCATGCTGTCTCCAGGAA<br>GACACCGCATCTGACTTCT      |
| mouse Hnrpa2b1     | AltExon (36)         | RT-PCR  | L-primer<br>R-Primer             | CGGAGGTCTTCTCATCTCG<br>AGCTTCCCCATGCTCATA       |
| mouse A2bp1        | AltExon (93)         | RT-PCR  | L-primer<br>R-Primer             | TTTAATGAGCGAGGCTCCAA<br>CATTGGGTAGGGGTTGACA     |
| mouse add1         | AltExon(87)          | RT-PCR  | L-primer<br>R-Primer             | ATTAAGACGGCAGGACCTCA<br>ATGGGGCTGGTATTCCTTCT    |
| Mouse Ndrp2        | AltExon(42)          | RT-PCR  | L-primer<br>R-Primer             | AGGACAAAACCCGAGACTG<br>GGGGTGCATACACAGTAA       |
| Mouse Itga7        | altExon(113)         | RT-PCR  | L-primer<br>R-Primer             | CTGGTACTGTGCTGTGGAA<br>CCTTGAATGCTGTGCGTCT      |
| Mouse 1110028E10f  | altExon(172)         | RT-PCR  | L-primer<br>R-Primer             | GGCTTCTCAGCGCTATGG<br>TGAACCGTCATTTCTCTCCA      |
| Mouse Tlk2(96)     | altExon(96)          | RT-PCR  | L-primer<br>R-Primer             | AAGGCACTCCTAGGGGACAT<br>GCTCTCTGAGGCTCCTTT      |
| Mouse AK122487/Sr  | AlterCassette(30)    | RT-PCR  | L-primer<br>R-primer             | CCAAGACTTCCCTCCAACAA<br>GAGTTCTGTGGGTTGGTA      |
| Mouse AF340029/Rr  | altExon(84)          | RT-PCR  | L-primer<br>R-Primer             | AGGTGTACAGGAGCCTCAAA<br>GGGACTCTTTCAGCACCTCA    |
| Mouse Vldlr        | altExon(84)          | RT-PCR  | L-primer<br>R-Primer             | TCCCAATGGGTACAATCTCG<br>TTTGGGGAAACTGACTTTC     |
| Mouse Rpn2         | altExon(48)          | RT-PCR  | L-primer<br>R-Primer             | CCCTCAAGTACCTGGCTGTC<br>CATGAAGTGTCCCACTCCT     |
| Mouse Mef2D        | altMutEx             | RT-PCR  | Forward(EcoN1)<br>Reverse(EcoN1) | GTACAACGAGCCACACGAGA<br>CATGGAGCTCTGATTGGACA    |
| Mouse Aplp2        | altExon(36)          | RT-PCR  | L-primer<br>R-Primer             | TCAGAGAACCCTGTGGATGTC<br>AATCAGTCCCCGCTTGTGT    |
| Mouse Dmwd         | altExon(75)          | RT-PCR  | L-primer<br>R-Primer             | TATCATCACTGCCTGCCAAG<br>GGGAGGGTTATGGCTAGGAG    |
| Mouse Xpa          | altExon(192)         | RT-PCR  | L-primer<br>R-Primer             | CAGGAAGCTCTGGAAGATGC<br>TGTGGTGTGAGTGGTTGTCTCTC |
| Human Nfix         | AltCassette(123)     | RT-PCR  | L-primer<br>R-primer             | AGCCCTGTGATGACGTGTT<br>AGTGCAGGGCTGATGCTGT      |
| Human Gnas         | AltCassette(45)      | RT-PCR  | L-primer<br>R-primer             | GCACCATTTGTGAAGCAGATG<br>TCAATCGCCTCTTTCAGGTT   |
| Human Spag9        | AltExon (39)         | RT-PCR  | L-primer<br>R-Primer             | TCTCCATCCCATTGACAGAA<br>CTGGGACTGCCACAAAAGAA    |
| Human 2610103J23   | AltExon (99)         | RT-PCR  | L-primer<br>R-Primer             | TGCCTGGAGTCAAGACACTG<br>GGAATTGGTTCTGGGACTT     |
| Human ppp2r5c      | AltExon (117)        | RT-PCR  | L-primer<br>R-Primer             | GGGAAGAAGCATGGGTTAAA<br>CTTCCAAGGCTTCTTGGTG     |
| Human Smyld        | AltCassette(39)      | RT-PCR  | L-primer<br>R-primer             | GTAGGCATCTTCCCAACCT<br>CTGCTTCTCAGCTGCCTCT      |
| Prepl              | Constitutive exon    | qRTPCR  | L-primer<br>R-primer             | CTGAGGACCTGCAGAGGAA<br>TTAGGCTCGGCTGAGAAAAG     |
| Casp12             | Constitutive exon    | qRTPCR  | L-primer                         | AAAGGGATAGCCACTGCTGA                            |



|         |                   |         |                      |                                                                                                                                   |
|---------|-------------------|---------|----------------------|-----------------------------------------------------------------------------------------------------------------------------------|
| Plekho1 | Constitutive exon | qRT-PCR | R-primer<br>L-primer | GAGGGAACCAGTCTTGCCCTA<br>GCCGTGAGTCTGAAGAGAA                                                                                      |
| Atf3    | Constitutive exon | qRT-PCR | R-primer<br>L-primer | GGGAGTGTGGATTTTTGCT<br>CTCTGGCCTGGAGTCAGTTA                                                                                       |
| Igfbp5  | Constitutive exon | qRT-PCR | R-primer<br>L-primer | GCAGGCACCTGTCTTCTCC<br>CCTGCACCTGAGATGAGACA                                                                                       |
| Fhl1    | Constitutive exon | qRT-PCR | R-Primer<br>L-primer | GAATCCTTTGCCGTCACAGT<br>GTGTCCAAGGATGGCAAGAT                                                                                      |
| Pdlim7  | Constitutive exon | qRT-PCR | R-Primer<br>L-primer | GTGCCCTTGTACTCCACGTT<br>GACTTCAATGTGCCCTCTC                                                                                       |
| Amot1   | Constitutive exon | qRT-PCR | R-Primer<br>L-primer | CTTGTCTTGGGCTTCGATGT<br>TATTCTGGGAGGCATGAAGC                                                                                      |
| Acvr2a  | Constitutive exon | qRT-PCR | R-Primer<br>L-primer | TTCCGTGGAAGAAAAGTTGG<br>GTTGCTGTGAGGGCAATATG                                                                                      |
| Smox    | Constitutive exon | qRT-PCR | R-Primer<br>L-primer | TAGGGTGGCTTCGGTGTAAAC<br>TTCACGGATGTCACCTGTGCT                                                                                    |
| Igf1    | Constitutive exon | qRT-PCR | R-Primer<br>L-primer | GCCATTGGCTTCTGTAGTT<br>TGGATGCTCTTCAGTTCGTG                                                                                       |
| Actc1   | Constitutive exon | qRT-PCR | R-Primer<br>L-primer | GGAAGCAACACTCATCCACA<br>TCGGGACCTCACTGACTACC                                                                                      |
| Kera    | Constitutive exon | qRT-PCR | R-Primer<br>L-primer | AGGGCGACGTAACACAGTTT<br>TCTTTTTGTATCCCCCATCA                                                                                      |
| Sln     | Constitutive exon | qRT-PCR | R-Primer<br>L-primer | AGTTTGGGGTTCGCATTACA<br>TGGAGGTGGAGACTGAGG                                                                                        |
| Ogn     | Constitutive exon | qRT-PCR | R-Primer<br>L-primer | TTTGGGCAGCCTACAAGAAC<br>TCCAGTCTTCTCCAAAGC                                                                                        |
| Thrsp   | Constitutive exon | qRT-PCR | R-Primer<br>L-primer | GGAGGCACAGATTCAGGT<br>GACAGGGCAGTTCTGTAGG                                                                                         |
| Kcnab1  | Constitutive exon | qRT-PCR | R-Primer<br>L-primer | CACTCAGAGGGAGACGGAAAG<br>ATGGGTGACATTTGGAGGTC                                                                                     |
| Csrp3   | Constitutive exon | qRT-PCR | R-Primer<br>L-primer | CCAGCAGCATAGACCTCAGC<br>TCGGTATACGCTGTGAGAA                                                                                       |
| Tnnc1   | Constitutive exon | qRT-PCR | R-primer<br>L-primer | TTGCAGTAGAGCTCCCATC<br>CTGCAGGAGATGATTGACGA                                                                                       |
| Cav1    | Constitutive exon | qRT-PCR | R-primer<br>L-primer | CGACAGCTCCTCCTCAGACT<br>GGGAAACAGGGCAACATCTAC                                                                                     |
| Col1a2  | Constitutive exon | qRT-PCR | R-primer<br>L-primer | GACCAGGTCAATCTCCTTGG<br>GGTCCAGCTGGCTCTCCT                                                                                        |
| Fads1   | Constitutive exon | qRT-PCR | R-primer<br>L-primer | GCCAGGAAGTCCAGGAGTC<br>AGCTTTGAACCCACCAAGAA                                                                                       |
| Fbln5   | Constitutive exon | qRT-PCR | R-Primer<br>L-primer | CAGGAAGAAGAGGTGGTTGG<br>CAGGCTACGCTCTGTGGAT                                                                                       |
| Col6a1  | Constitutive exon | qRT-PCR | R-Primer<br>L-primer | TGAAGCCCCCTGTAGATTG<br>AAGCGCTTCATTGACAACCT                                                                                       |
| Col4a1  | Constitutive exon | qRT-PCR | R-Primer<br>L-primer | CCTCGGATGATCTCCACCT<br>CCCAGGGACCAAAATCTTT                                                                                        |
| Eln     | Constitutive exon | qRT-PCR | R-Primer<br>L-primer | GGGCATGGTGCTGAACCTAC<br>TGGACCTGGAGGACTTGG                                                                                        |
| Fbn1    | Constitutive exon | qRT-PCR | R-Primer<br>L-primer | CATACTGGGACGCTTAGCA<br>CAAGTGAAACGGGGAAATAA                                                                                       |
| Sparc   | Constitutive exon | qRT-PCR | R-Primer<br>L-primer | AGGCTCTGCCGATGTTGTAG<br>ACGAGAGAGATGAGGGCAAC                                                                                      |
| Cdh5    | Constitutive exon | qRT-PCR | R-Primer<br>L-primer | CCAGTGGACAGGGAAGATGT<br>GCGAGTACAGGGACACCTTC                                                                                      |
| Rgs5    | Constitutive exon | qRT-PCR | R-Primer<br>L-primer | ATCGGATAGTGGGCTGTG<br>GAGGAGTCTGCAGTGG                                                                                            |
| Nfix    | exon(123bp)       | Cloning | R-Primer<br>L-primer | CTCAAGGTTTTCTCACTGAAT<br>aaaagggcccTAATACGACTCACTATAGGGTGTACCAGGGCCCTATTTCTCTCTC                                                  |
| Vldlr   | Exon (84bp)       | Cloning | R-Primer<br>L-primer | aaaaagatctATTCTAGGAACCGAGTGGGAGCCTGG<br>aaaagggcccTAATACGACTCACTATAGGGCTTCTCAATTTCCGGATCTTTG<br>aaaaagatctCAAGAGAAATCCAGGATGTGCAG |

**Supplementary Table 9. Primers for RT-PCR and qRT-PCR and cloning.**
